# Supplementary material for: Ab initio kinetics of the CH3NH + NO2 reaction: formation of nitramines and N-alkyl nitroxides
Source: Royal Society of Chemistry journal article supplement (doi:10.1039/d3cp03333c), 2023-01-01
Supplement: d3cp03333c1.pdf [file d3cp03333c1.pdf]

**Supplementary Information for**  
***Ab Initio* Kinetics of the  $\text{CH}_3\text{NH} + \text{NO}_2$  Reaction: Formation of Nitramines**  
**and *N*-Alkyl Nitroxides**

Loc T. Nguyen<sup>1,2,‡</sup>, Tam V.-T. Mai,<sup>3,4,‡</sup> Huy D. Vien<sup>1,2</sup>, Trang T. Nguyen<sup>1,2</sup> and Lam K. Huynh<sup>1,2,\*</sup>

<sup>1</sup> International University, Quarter 6, Linh Trung Ward, Thu Duc City, Ho Chi Minh City, Vietnam.

<sup>2</sup> Vietnam National University, Ho Chi Minh City, Vietnam.

<sup>3</sup> Institute of Fundamental and Applied Sciences, Duy Tan University, 06 Tran Nhat Duat, Tan Dinh Ward, District 1, Ho Chi Minh City, Vietnam.

<sup>4</sup> Faculty of Natural Sciences, Duy Tan University, Da Nang City, Vietnam

\*Corresponding author.

‡Equal contribution

## Contents

|                                                                                                                                                                                                                                                                       |    |
|-----------------------------------------------------------------------------------------------------------------------------------------------------------------------------------------------------------------------------------------------------------------------|----|
| <b>Table S1:</b> The optimized geometries, electronic energies at 0 K ( $E_{elec}^{0K}$ ), zero-point energy (ZPE) corrections (without scaling factor), harmonic wavenumbers of the species involved, calculated at W1U level of theory for the title reaction. .... | 3  |
| <b>Table S2:</b> High-pressure rate constants for the $\text{CH}_3\text{NH} + \text{NO}_2$ system calculated at W1U method <sup>[a]</sup> . ....                                                                                                                      | 9  |
| <b>Table S3:</b> $k(T, P)_{\text{tot}}$ (overall rate constants) for the $\text{CH}_3\text{NH} + \text{NO}_2 \rightarrow$ products, calculated at different pressures. ....                                                                                           | 11 |
| <b>Table S4:</b> T1 diagnostics for the species involved in $\text{CH}_3\text{NH} + \text{NO}_2$ reaction computed at CCSD(T)/cc-pVQZ based on the B3LYP/cc-pVTZ+d and M06-2X/cc-pVTZ+d geometries. ....                                                              | 12 |
| <b>Table S5:</b> Detailed kinetic submechanism in NASA format for the reaction $\text{CH}_3\text{NH} + \text{NO}_2$ . ....                                                                                                                                            | 13 |
| <b>Figure S1:</b> Reaction pathway scheme of the $\text{CH}_3\text{NH} + \text{NO}_2$ reaction. Dashed arrows present the reactions without tight transition states. ....                                                                                             | 16 |
| <b>Figure S2:</b> B3LYP/cc-pVTZ+d optimized geometries for the species involved in the $\text{CH}_3\text{NH} + \text{NO}_2$ reaction. All structures were obtained for the lowest-energy conformer of a given species. Bond lengths are in Å. ....                    | 19 |
| <b>Figure S3:</b> Hindrance potentials for the species involved in the $\text{CH}_3\text{NH} + \text{NO}_2$ reaction, calculated at B3LYP/cc-pVDZ level of theory. ....                                                                                               | 25 |
| <b>Figure S4:</b> IRC plot for the conversion between <b>I1</b> and <b>I5</b> (via <b>TS7</b> ) calculated at B3LYP/cc-pVTZ+d level of theory. Distances are in Å. ....                                                                                               | 25 |
| <b>Figure S5:</b> Calculated overall rate constant, $k_{\text{tot}}$ , for the reaction between $\text{CH}_3\text{NH}$ and $\text{NO}_2$ using the PES characterized at W1U and G4 levels of theory at $P = 760$ Torr. ....                                           | 26 |

**Table S1:** The optimized geometries, electronic energies at 0 K ( $E_{elec}^{0K}$ ), zero-point energy (ZPE) corrections (without scaling factor), harmonic wavenumbers of the species involved, calculated at WIU level of theory for the title reaction.

| Species                                      | Cartesian coordinate<br>(Å) |              |              | $E_{elec}^{0K}$<br>(Hartree) | ZPE<br>(Hartree) | Unscaled vibrational frequencies <sup> a </sup> (cm <sup>-1</sup> ) |                                                             |           |           |
|----------------------------------------------|-----------------------------|--------------|--------------|------------------------------|------------------|---------------------------------------------------------------------|-------------------------------------------------------------|-----------|-----------|
| <b>CH<sub>3</sub>NH</b><br>(C <sub>s</sub> ) | 7                           | -0.801905000 | 0.152653000  | -0.000002000                 | -95.220370       | 0.048581                                                            | 252.6533                                                    | 949.3536  | 1006.9376 |
|                                              | 1                           | -1.209113000 | -0.788345000 | 0.000006000                  |                  |                                                                     | 1041.5963                                                   | 1339.1806 | 1392.9122 |
|                                              | 6                           | 0.626711000  | -0.012084000 | -0.000003000                 |                  |                                                                     | 1476.8046                                                   | 1485.6711 | 2944.5395 |
|                                              | 1                           | 0.968370000  | -0.582305000 | -0.876219000                 |                  |                                                                     | 2974.7192                                                   | 3082.6076 | 3377.7554 |
|                                              | 1                           | 1.125442000  | 0.956762000  | -0.000059000                 |                  |                                                                     |                                                             |           |           |
|                                              | 1                           | 0.968367000  | -0.582179000 | 0.876299000                  |                  |                                                                     |                                                             |           |           |
| <b>NO<sub>2</sub></b><br>(C <sub>2v</sub> )  | 7                           | 0.000000000  | 0.000000000  | 0.321408000                  | -205.194993      | 0.008783                                                            | 766.6921                                                    | 1391.8445 | 1696.6674 |
|                                              | 8                           | 0.000000000  | 1.098754000  | -0.140616000                 |                  |                                                                     | (750 <sup>1</sup> ; 1318 <sup>1</sup> ; 1618 <sup>2</sup> ) |           |           |
|                                              | 8                           | 0.000000000  | -1.098754000 | -0.140616000                 |                  |                                                                     |                                                             |           |           |
| <b>I1</b><br>(C <sub>1</sub> )               | 6                           | -1.813257000 | 0.021736000  | 0.082443000                  | -300.505393      | 0.067100                                                            | 138.0721                                                    | 178.4764  | 303.0174  |
|                                              | 1                           | -1.948113000 | 0.842071000  | -0.616390000                 |                  |                                                                     | 526.3556                                                    | 585.6371  | 747.3428  |
|                                              | 1                           | -1.865742000 | 0.412718000  | 1.100902000                  |                  |                                                                     | 793.9449                                                    | 945.8673  | 1109.2837 |
|                                              | 1                           | -2.605638000 | -0.708047000 | -0.069828000                 |                  |                                                                     | 1146.5185                                                   | 1202.0121 | 1355.2583 |
|                                              | 7                           | -0.558458000 | -0.656404000 | -0.192063000                 |                  |                                                                     | 1423.1319                                                   | 1462.1558 | 1481.9700 |
|                                              | 1                           | -0.422324000 | -1.603531000 | 0.127847000                  |                  |                                                                     | 1517.1696                                                   | 1654.4160 | 3030.5238 |
|                                              | 7                           | 0.613645000  | 0.049398000  | -0.020471000                 |                  |                                                                     | 3109.7747                                                   | 3143.8128 | 3598.9523 |
|                                              | 8                           | 1.630892000  | -0.619615000 | 0.081950000                  |                  |                                                                     |                                                             |           |           |
|                                              | 8                           | 0.535989000  | 1.266542000  | -0.025631000                 |                  |                                                                     |                                                             |           |           |
| <b>I2</b><br>(C <sub>s</sub> )               | 6                           | 1.833839000  | -0.110459000 | 0.000284000                  | -300.493827      | 0.066188                                                            | 154.3161                                                    | 250.2920  | 310.9255  |
|                                              | 1                           | 1.964609000  | 0.522138000  | 0.881745000                  |                  |                                                                     | 467.3456                                                    | 541.8352  | 647.5326  |
|                                              | 1                           | 1.964877000  | 0.522025000  | -0.881220000                 |                  |                                                                     | 739.6108                                                    | 933.7899  | 1031.4883 |
|                                              | 1                           | 2.575910000  | -0.902662000 | 0.000447000                  |                  |                                                                     | 1108.6982                                                   | 1185.5651 | 1308.6083 |
|                                              | 7                           | 0.523232000  | -0.744425000 | 0.000125000                  |                  |                                                                     | 1346.9343                                                   | 1437.3246 | 1479.1448 |
|                                              | 1                           | -1.486020000 | -1.440972000 | -0.000136000                 |                  |                                                                     | 1483.0849                                                   | 1687.4339 | 3016.6878 |
|                                              | 7                           | -0.413191000 | 0.091835000  | -0.000069000                 |                  |                                                                     | 3066.8814                                                   | 3143.8099 | 3711.6839 |
|                                              | 8                           | -1.688601000 | -0.491007000 | -0.000224000                 |                  |                                                                     |                                                             |           |           |
|                                              | 8                           | -0.410485000 | 1.307300000  | -0.000142000                 |                  |                                                                     |                                                             |           |           |
| <b>I3</b><br>(C <sub>s</sub> )               | 6                           | -1.801755000 | 0.003566000  | -0.000002000                 | -300.488677      | 0.065821                                                            | 155.4429                                                    | 242.5498  | 332.4570  |
|                                              | 1                           | -1.861967000 | 0.640741000  | -0.884102000                 |                  |                                                                     | 457.3105                                                    | 562.2277  | 620.7980  |
|                                              | 1                           | -1.861970000 | 0.640699000  | 0.884128000                  |                  |                                                                     | 710.8906                                                    | 752.3310  | 1052.2292 |
|                                              | 1                           | -2.635247000 | -0.692228000 | -0.000020000                 |                  |                                                                     | 1102.5953                                                   | 1143.8537 | 1285.8856 |

| Species                         | Cartesian coordinate<br>(Å) |              |              | $E_{elec}^{0K}$<br>(Hartree) | ZPE<br>(Hartree) | Unscaled vibrational frequencies <sup> a </sup> (cm <sup>-1</sup> ) |           |           |           |
|---------------------------------|-----------------------------|--------------|--------------|------------------------------|------------------|---------------------------------------------------------------------|-----------|-----------|-----------|
|                                 | 7                           | -0.587781000 | -0.799710000 | -0.000019000                 |                  |                                                                     | 1335.8594 | 1441.3640 | 1486.3943 |
|                                 | 1                           | 1.379487000  | 1.466778000  | 0.000038000                  |                  |                                                                     | 1493.6191 | 1732.5026 | 3026.6720 |
|                                 | 7                           | 0.492132000  | -0.191061000 | -0.000003000                 |                  |                                                                     | 3082.3462 | 3138.8270 | 3735.8537 |
|                                 | 8                           | 1.624006000  | -0.646870000 | -0.000013000                 |                  |                                                                     |           |           |           |
|                                 | 8                           | 0.433465000  | 1.254121000  | 0.000029000                  |                  |                                                                     |           |           |           |
| <b>I4</b><br>(C <sub>1</sub> )  | 6                           | 1.817991000  | -0.308253000 | -0.340699000                 | -300.469573      | 0.064550                                                            | 41.2356   | 211.4670  | 304.5276  |
|                                 | 1                           | 2.361519000  | 0.579213000  | -0.656982000                 |                  |                                                                     | 362.6805  | 487.9637  | 603.6424  |
|                                 | 1                           | 1.401068000  | -0.808130000 | -1.219654000                 |                  |                                                                     | 778.3168  | 855.4736  | 990.4554  |
|                                 | 1                           | 2.515461000  | -0.981055000 | 0.158803000                  |                  |                                                                     | 1019.5498 | 1158.2394 | 1242.6588 |
|                                 | 7                           | 0.811245000  | 0.074270000  | 0.652518000                  |                  |                                                                     | 1442.3505 | 1478.8039 | 1495.8993 |
|                                 | 1                           | 0.283070000  | -0.750015000 | 0.937917000                  |                  |                                                                     | 1520.9702 | 1686.7613 | 3010.1087 |
|                                 | 7                           | -1.405468000 | 0.328528000  | -0.298043000                 |                  |                                                                     | 3088.1140 | 3121.5747 | 3433.4967 |
|                                 | 8                           | -0.144214000 | 0.919962000  | 0.017707000                  |                  |                                                                     |           |           |           |
|                                 | 8                           | -1.519474000 | -0.796221000 | 0.025140000                  |                  |                                                                     |           |           |           |
| <b>I5</b><br>(C <sub>1</sub> )  | 6                           | 2.034811000  | -0.468953000 | -0.023959000                 | -300.468648      | 0.064447                                                            | 91.4384   | 189.7544  | 217.1731  |
|                                 | 1                           | 1.741328000  | -1.374219000 | -0.552523000                 |                  |                                                                     | 366.1232  | 413.0034  | 545.8714  |
|                                 | 1                           | 2.206159000  | -0.709394000 | 1.029908000                  |                  |                                                                     | 709.9643  | 935.2627  | 982.4874  |
|                                 | 1                           | 2.962507000  | -0.100466000 | -0.463371000                 |                  |                                                                     | 1059.9938 | 1167.3505 | 1220.3868 |
|                                 | 7                           | 1.020058000  | 0.558901000  | -0.232144000                 |                  |                                                                     | 1444.4426 | 1476.5269 | 1485.4411 |
|                                 | 1                           | 1.306838000  | 1.423042000  | 0.216277000                  |                  |                                                                     | 1518.8394 | 1781.0692 | 3003.5214 |
|                                 | 7                           | -1.238918000 | 0.033307000  | -0.461740000                 |                  |                                                                     | 3080.2383 | 3111.9039 | 3488.0653 |
|                                 | 8                           | -0.146932000 | 0.190745000  | 0.501229000                  |                  |                                                                     |           |           |           |
|                                 | 8                           | -2.214777000 | -0.262082000 | 0.095102000                  |                  |                                                                     |           |           |           |
| <b>PC1</b><br>(C <sub>s</sub> ) | 6                           | 2.099504000  | 0.569343000  | 0.000037000                  | -300.511381      | 0.062636                                                            | 67.5933   | 110.6307  | 161.5135  |
|                                 | 1                           | -0.126475000 | -0.855904000 | -0.000028000                 |                  |                                                                     | 194.6588  | 229.3748  | 274.3572  |
|                                 | 1                           | 1.397572000  | 1.399750000  | 0.000023000                  |                  |                                                                     | 707.5268  | 989.6424  | 1016.0589 |
|                                 | 1                           | 3.164728000  | 0.803583000  | 0.000087000                  |                  |                                                                     | 1081.0765 | 1123.8887 | 1153.3468 |
|                                 | 7                           | 1.637704000  | -0.607370000 | -0.000006000                 |                  |                                                                     | 1383.7772 | 1471.0896 | 1484.1776 |
|                                 | 1                           | 2.363055000  | -1.322394000 | 0.000010000                  |                  |                                                                     | 1655.1694 | 1717.6843 | 3000.8914 |
|                                 | 7                           | -1.818627000 | 0.094815000  | -0.000016000                 |                  |                                                                     | 3051.9749 | 3153.6364 | 3465.8161 |
|                                 | 8                           | -1.151632000 | 1.082978000  | 0.000018000                  |                  |                                                                     |           |           |           |
|                                 | 8                           | -1.114549000 | -1.064629000 | -0.000038000                 |                  |                                                                     |           |           |           |
| <b>PC2</b><br>(C <sub>1</sub> ) | 6                           | -0.478164000 | 1.545086000  | -0.259554000                 | -300.507656      | 0.060126                                                            | 45.8825   | 101.3148  | 115.9203  |
|                                 | 1                           | 1.724992000  | -0.502876000 | 0.629597000                  |                  |                                                                     | 134.0171  | 185.4964  | 233.9317  |

| Species                         | Cartesian coordinate<br>(Å) |              |              | $E_{elec}^{0K}$<br>(Hartree) | ZPE<br>(Hartree) | Unscaled vibrational frequencies <sup> a </sup> (cm <sup>-1</sup> ) |            |           |           |
|---------------------------------|-----------------------------|--------------|--------------|------------------------------|------------------|---------------------------------------------------------------------|------------|-----------|-----------|
|                                 | 7                           | -1.095044000 | 0.619055000  | 0.339175000                  |                  |                                                                     | 353.4693   | 411.1460  | 528.4905  |
|                                 | 1                           | 2.675154000  | -0.719279000 | -0.541086000                 |                  |                                                                     | 734.9168   | 925.4886  | 1074.8206 |
|                                 | 1                           | -0.899721000 | 2.543268000  | -0.220175000                 |                  |                                                                     | 1193.1122  | 1488.5410 | 1606.3307 |
|                                 | 7                           | -0.552495000 | -0.648069000 | 0.393918000                  |                  |                                                                     | 1649.5468  | 1708.1530 | 3079.8624 |
|                                 | 8                           | 2.333464000  | -0.036257000 | 0.043649000                  |                  |                                                                     | 3188.4679  | 3761.4513 | 3871.9762 |
|                                 | 1                           | 0.457880000  | 1.377489000  | -0.788029000                 |                  |                                                                     |            |           |           |
|                                 | 8                           | -1.028032000 | -1.434495000 | -0.375478000                 |                  |                                                                     |            |           |           |
| <b>TS1</b><br>(C <sub>s</sub> ) | 6                           | -1.848773000 | -0.031497000 | -0.000001000                 | -300.444098      | 0.061550                                                            | -1892.6632 | 47.6517   | 161.6616  |
|                                 | 1                           | -2.572424000 | -0.841309000 | -0.000002000                 |                  |                                                                     | 287.5551   | 630.2198  | 730.3719  |
|                                 | 1                           | -1.999775000 | 0.587422000  | -0.887267000                 |                  |                                                                     | 731.1629   | 931.9566  | 1023.9090 |
|                                 | 1                           | -1.999776000 | 0.587420000  | 0.887267000                  |                  |                                                                     | 1129.2240  | 1180.6365 | 1222.4633 |
|                                 | 7                           | -0.531120000 | -0.629419000 | -0.000001000                 |                  |                                                                     | 1375.4190  | 1447.8530 | 1477.3559 |
|                                 | 1                           | 0.450704000  | -1.473901000 | -0.000002000                 |                  |                                                                     | 1494.2476  | 1609.5008 | 2301.8468 |
|                                 | 7                           | 0.529847000  | 0.131784000  | 0.000000000                  |                  |                                                                     | 3019.1489  | 3072.2891 | 3142.9724 |
|                                 | 8                           | 1.531411000  | -0.730738000 | -0.000001000                 |                  |                                                                     |            |           |           |
|                                 | 8                           | 0.621441000  | 1.332337000  | 0.000002000                  |                  |                                                                     |            |           |           |
| <b>TS2</b><br>(C <sub>i</sub> ) | 7                           | 1.111205000  | -0.923977000 | -0.150837000                 | -300.419250      | 0.059724                                                            | -1459.9558 | 190.6577  | 282.2249  |
|                                 | 1                           | 0.931816000  | -1.410915000 | 0.725735000                  |                  |                                                                     | 376.6272   | 524.1662  | 538.7866  |
|                                 | 6                           | 1.816291000  | 0.202649000  | 0.020877000                  |                  |                                                                     | 628.7931   | 831.9012  | 980.2415  |
|                                 | 1                           | 2.342596000  | 0.558943000  | -0.863496000                 |                  |                                                                     | 1060.8424  | 1072.5391 | 1268.7387 |
|                                 | 1                           | 0.750400000  | 1.004315000  | 0.013981000                  |                  |                                                                     | 1285.7081  | 1332.8299 | 1375.9120 |
|                                 | 1                           | 2.275818000  | 0.435663000  | 0.982666000                  |                  |                                                                     | 1529.4277  | 1558.4087 | 1760.6987 |
|                                 | 7                           | -0.790074000 | -0.070631000 | 0.019089000                  |                  |                                                                     | 3027.0492  | 3119.3203 | 3471.0380 |
|                                 | 8                           | -0.533407000 | 1.157980000  | 0.003077000                  |                  |                                                                     |            |           |           |
|                                 | 8                           | -1.897380000 | -0.513185000 | -0.010816000                 |                  |                                                                     |            |           |           |
| <b>TS3</b><br>(C <sub>i</sub> ) | 6                           | -2.219091000 | -0.395242000 | 0.215907000                  | -300.366594      | 0.057394                                                            | -366.6136  | 73.4353   | 154.4933  |
|                                 | 1                           | -2.856975000 | 0.483423000  | -0.191725000                 |                  |                                                                     | 199.5416   | 271.3846  | 309.9706  |
|                                 | 1                           | -2.310490000 | -0.386548000 | 1.316750000                  |                  |                                                                     | 395.1998   | 689.2550  | 856.8197  |
|                                 | 1                           | -2.627140000 | -1.312835000 | -0.242668000                 |                  |                                                                     | 913.2361   | 1034.8205 | 1166.6846 |
|                                 | 7                           | -1.317793000 | 0.355642000  | -0.431280000                 |                  |                                                                     | 1242.6074  | 1340.3249 | 1417.2663 |
|                                 | 1                           | 0.199459000  | 1.407577000  | 0.095716000                  |                  |                                                                     | 1551.9544  | 1757.5110 | 2611.5313 |
|                                 | 7                           | 0.890445000  | -0.246307000 | -0.043967000                 |                  |                                                                     | 2881.4008  | 2918.0639 | 3407.4203 |
|                                 | 8                           | 1.132048000  | 1.090644000  | 0.163428000                  |                  |                                                                     |            |           |           |
|                                 | 8                           | 1.855593000  | -0.913832000 | -0.031776000                 |                  |                                                                     |            |           |           |

| Species                         | Cartesian coordinate<br>(Å) |              |              | $E_{elec}^{0K}$<br>(Hartree) | ZPE<br>(Hartree) | Unscaled vibrational frequencies <sup> a </sup> (cm <sup>-1</sup> ) |            |           |           |
|---------------------------------|-----------------------------|--------------|--------------|------------------------------|------------------|---------------------------------------------------------------------|------------|-----------|-----------|
| <b>TS4</b><br>(C <sub>s</sub> ) | 6                           | 1.851527000  | 0.068704000  | -0.000006000                 | -300.447877      | 0.061656                                                            | -1855.4543 | 82.5600   | 260.0775  |
|                                 | 1                           | 1.877718000  | 0.709134000  | 0.883465000                  |                  |                                                                     | 297.9440   | 607.1480  | 668.4966  |
|                                 | 1                           | 1.877710000  | 0.709202000  | -0.883426000                 |                  |                                                                     | 796.8801   | 983.7930  | 1072.9294 |
|                                 | 1                           | 2.708847000  | -0.596226000 | -0.000035000                 |                  |                                                                     | 1077.3535  | 1106.5360 | 1167.2248 |
|                                 | 7                           | 0.654508000  | -0.768231000 | -0.000033000                 |                  |                                                                     | 1319.2950  | 1432.7629 | 1479.1754 |
|                                 | 1                           | -1.743352000 | 0.647569000  | 0.000033000                  |                  |                                                                     | 1489.6482  | 1632.9284 | 2322.4302 |
|                                 | 7                           | -0.395817000 | -0.133043000 | -0.000003000                 |                  |                                                                     | 3029.3943  | 3086.4960 | 3150.7302 |
|                                 | 8                           | -1.610020000 | -0.628509000 | -0.000017000                 |                  |                                                                     |            |           |           |
|                                 | 8                           | -0.595095000 | 1.181886000  | 0.000048000                  |                  |                                                                     |            |           |           |
| <b>TS5</b><br>(C <sub>i</sub> ) | 6                           | 1.965321000  | -0.081268000 | 0.208911000                  | -300.436308      | 0.064317                                                            | -376.1551  | 127.0454  | 196.1793  |
|                                 | 1                           | 2.028810000  | -1.009714000 | 0.783383000                  |                  |                                                                     | 472.2292   | 499.2629  | 541.4050  |
|                                 | 1                           | 2.116876000  | 0.777215000  | 0.869884000                  |                  |                                                                     | 710.3742   | 772.3399  | 953.6421  |
|                                 | 1                           | 2.756868000  | -0.085106000 | -0.535292000                 |                  |                                                                     | 1085.6131  | 1141.3616 | 1237.5456 |
|                                 | 7                           | 0.707798000  | 0.018714000  | -0.492359000                 |                  |                                                                     | 1384.8872  | 1446.0313 | 1487.5674 |
|                                 | 1                           | -2.081984000 | -0.770856000 | 0.307118000                  |                  |                                                                     | 1497.1142  | 1780.2182 | 2993.7101 |
|                                 | 7                           | -0.428531000 | 0.156622000  | -0.091611000                 |                  |                                                                     | 3047.2853  | 3128.0354 | 3729.9955 |
|                                 | 8                           | -1.203616000 | -1.097785000 | 0.057810000                  |                  |                                                                     |            |           |           |
|                                 | 8                           | -1.117306000 | 1.141374000  | 0.118344000                  |                  |                                                                     |            |           |           |
| <b>TS6</b><br>(C <sub>i</sub> ) | 6                           | -1.612379000 | -0.512075000 | 0.005618000                  | -300.415333      | 0.057666                                                            | -1527.0879 | 171.1138  | 213.3385  |
|                                 | 1                           | -1.198006000 | 0.783858000  | 0.031585000                  |                  |                                                                     | 308.8569   | 408.1669  | 470.1734  |
|                                 | 7                           | -0.282007000 | -1.002062000 | 0.015792000                  |                  |                                                                     | 560.6707   | 613.0817  | 677.0925  |
|                                 | 1                           | -0.000760000 | 1.929905000  | 0.768627000                  |                  |                                                                     | 781.7161   | 970.6639  | 1018.4264 |
|                                 | 1                           | -2.162626000 | -0.898243000 | 0.860872000                  |                  |                                                                     | 1147.6666  | 1358.9937 | 1475.1012 |
|                                 | 7                           | 0.683359000  | -0.307853000 | 0.013068000                  |                  |                                                                     | 1534.9643  | 1624.3747 | 1962.1554 |
|                                 | 8                           | -0.317855000 | 1.659308000  | -0.100841000                 |                  |                                                                     | 3072.3508  | 3138.5645 | 3804.8021 |
|                                 | 1                           | -2.099870000 | -0.770858000 | -0.932886000                 |                  |                                                                     |            |           |           |
|                                 | 8                           | 1.858613000  | -0.259658000 | -0.019650000                 |                  |                                                                     |            |           |           |
| <b>TS7</b><br>(C <sub>i</sub> ) | 6                           | -1.934184000 | -0.194353000 | -0.343388000                 | -300.373713      | 0.060634                                                            | -904.1806  | 91.7438   | 163.1137  |
|                                 | 1                           | -1.781993000 | -0.961243000 | -1.097878000                 |                  |                                                                     | 215.4695   | 245.3370  | 397.2903  |
|                                 | 1                           | -2.038889000 | 0.788516000  | -0.804669000                 |                  |                                                                     | 730.5741   | 868.0701  | 942.5240  |
|                                 | 1                           | -2.872503000 | -0.408426000 | 0.197096000                  |                  |                                                                     | 999.1949   | 1049.0903 | 1105.9337 |
|                                 | 7                           | -0.924511000 | -0.278442000 | 0.666264000                  |                  |                                                                     | 1319.9850  | 1380.1445 | 1418.6109 |
|                                 | 1                           | -0.990132000 | 0.539306000  | 1.277565000                  |                  |                                                                     | 1510.3243  | 1619.8116 | 2940.1489 |
|                                 | 7                           | 0.871171000  | -0.164859000 | -0.313030000                 |                  |                                                                     | 3057.4221  | 3134.2539 | 3426.3156 |

| Species                                       | Cartesian coordinate<br>(Å) |              |              | $E_{elec}^{0K}$<br>(Hartree) | ZPE<br>(Hartree) | Unscaled vibrational frequencies <sup> a </sup> (cm <sup>-1</sup> ) |                                                                     |           |           |
|-----------------------------------------------|-----------------------------|--------------|--------------|------------------------------|------------------|---------------------------------------------------------------------|---------------------------------------------------------------------|-----------|-----------|
|                                               | 8                           | 0.510724000  | 1.060912000  | -0.038241000                 |                  |                                                                     |                                                                     |           |           |
|                                               | 8                           | 1.947026000  | -0.522028000 | 0.040187000                  |                  |                                                                     |                                                                     |           |           |
| <b>TS8</b><br>(C <sub>1</sub> )               | 7                           | -1.527136000 | 0.596185000  | -0.135701000                 | -300.408879      | 0.060950                                                            | -478.6243                                                           | 173.7925  | 277.2430  |
|                                               | 1                           | -1.580811000 | 1.074200000  | 0.761922000                  |                  |                                                                     | 334.4568                                                            | 484.7625  | 538.6410  |
|                                               | 6                           | -1.631680000 | -0.767592000 | 0.020089000                  |                  |                                                                     | 782.8549                                                            | 860.6205  | 928.2080  |
|                                               | 1                           | -2.002729000 | -1.142772000 | 0.976257000                  |                  |                                                                     | 1099.5812                                                           | 1157.9449 | 1216.3371 |
|                                               | 1                           | -2.072431000 | -1.255726000 | -0.849286000                 |                  |                                                                     | 1299.5464                                                           | 1357.1100 | 1402.3260 |
|                                               | 1                           | -0.507057000 | -1.102231000 | -0.007281000                 |                  |                                                                     | 1508.5969                                                           | 1579.6876 | 2149.8594 |
|                                               | 7                           | 0.918970000  | -0.199451000 | -0.011220000                 |                  |                                                                     | 3022.3235                                                           | 3102.6777 | 3477.1694 |
|                                               | 8                           | 2.111423000  | -0.396068000 | 0.014968000                  |                  |                                                                     |                                                                     |           |           |
|                                               | 8                           | 0.414861000  | 0.927935000  | -0.011681000                 |                  |                                                                     |                                                                     |           |           |
| <b>TS9</b><br>(C <sub>1</sub> )               | 6                           | 1.470984000  | -0.638445000 | 0.100455000                  | -300.387072      | 0.058311                                                            | -1291.3849                                                          | 58.3863   | 272.6942  |
|                                               | 1                           | 0.343085000  | -1.056278000 | -0.107395000                 |                  |                                                                     | 417.7606                                                            | 442.4808  | 526.5532  |
|                                               | 1                           | 1.700583000  | -0.947109000 | 1.120646000                  |                  |                                                                     | 666.3620                                                            | 824.6513  | 940.5302  |
|                                               | 1                           | 2.012342000  | -1.156151000 | -0.693423000                 |                  |                                                                     | 1070.5982                                                           | 1117.7012 | 1218.7666 |
|                                               | 7                           | 1.271370000  | 0.681501000  | -0.169013000                 |                  |                                                                     | 1244.9025                                                           | 1302.3048 | 1325.1804 |
|                                               | 1                           | 1.229681000  | 1.240605000  | 0.682078000                  |                  |                                                                     | 1421.4693                                                           | 1508.7731 | 1626.6035 |
|                                               | 7                           | -1.323297000 | 0.101900000  | 0.343929000                  |                  |                                                                     | 3022.2787                                                           | 3114.3371 | 3473.3377 |
|                                               | 8                           | -0.646585000 | 1.049931000  | -0.159106000                 |                  |                                                                     |                                                                     |           |           |
|                                               | 8                           | -1.071928000 | -1.016707000 | -0.194526000                 |                  |                                                                     |                                                                     |           |           |
| <b>TS10</b><br>(C <sub>1</sub> )              | 6                           | -1.816844000 | 0.568828000  | 0.101057000                  | -300.451281      | 0.063251                                                            | -261.7171                                                           | 106.2161  | 201.5860  |
|                                               | 1                           | -1.321282000 | 1.522433000  | 0.272592000                  |                  |                                                                     | 301.9898                                                            | 365.2865  | 462.8744  |
|                                               | 1                           | -2.252529000 | 0.222736000  | 1.044106000                  |                  |                                                                     | 720.6882                                                            | 797.8277  | 961.3273  |
|                                               | 1                           | -2.613608000 | 0.720034000  | -0.629387000                 |                  |                                                                     | 1053.5971                                                           | 1161.2177 | 1210.1118 |
|                                               | 7                           | -0.866358000 | -0.376777000 | -0.471484000                 |                  |                                                                     | 1441.9172                                                           | 1471.2610 | 1475.7506 |
|                                               | 1                           | -1.327713000 | -1.245968000 | -0.716603000                 |                  |                                                                     | 1516.4083                                                           | 1849.9976 | 2997.1281 |
|                                               | 7                           | 1.466972000  | -0.327876000 | -0.181118000                 |                  |                                                                     | 3072.2561                                                           | 3109.9857 | 3486.4734 |
|                                               | 8                           | 0.087734000  | -0.742993000 | 0.509230000                  |                  |                                                                     |                                                                     |           |           |
|                                               | 8                           | 1.688754000  | 0.780540000  | -0.010333000                 |                  |                                                                     |                                                                     |           |           |
| <b>CH<sub>2</sub>=NH</b><br>(C <sub>s</sub> ) | 6                           | 0.055963000  | 0.582385000  | 0.000000000                  | -94.664232       | 0.039785                                                            | 1074.3843                                                           | 1101.5529 | 1169.2041 |
|                                               | 1                           | -0.840330000 | 1.209840000  | 0.000000000                  |                  |                                                                     | 1372.3390                                                           | 1492.8378 | 1713.1064 |
|                                               | 1                           | 1.009846000  | 1.109427000  | 0.000000000                  |                  |                                                                     | 3010.5207                                                           | 3104.0728 | 3425.7671 |
|                                               | 7                           | 0.055963000  | -0.680883000 | 0.000000000                  |                  |                                                                     | (1058; 1061; 1127; 1344; 1452; 1638; 2914; 3024; 3263) <sup>3</sup> |           |           |
|                                               | 1                           | -0.897036000 | -1.047398000 | 0.000000000                  |                  |                                                                     |                                                                     |           |           |

| Species                                                  | Cartesian coordinate<br>(Å) |              |              | $E_{elec}^{0K}$<br>(Hartree) | ZPE<br>(Hartree) | Unscaled vibrational frequencies <sup> a </sup> (cm <sup>-1</sup> ) |                                                                                                                      |           |           |
|----------------------------------------------------------|-----------------------------|--------------|--------------|------------------------------|------------------|---------------------------------------------------------------------|----------------------------------------------------------------------------------------------------------------------|-----------|-----------|
| <b>HONO (cis)</b><br>(C <sub>s</sub> )                   | 7                           | -0.171354000 | -0.519439000 | -0.000077000                 | -205.830337      | 0.020156                                                            | 631.1661                                                                                                             | 702.5896  | 878.8425  |
|                                                          | 8                           | 1.089362000  | 0.067553000  | 0.000037000                  |                  |                                                                     | 1336.9617                                                                                                            | 1714.2846 | 3583.4347 |
|                                                          | 1                           | 0.934015000  | 1.033966000  | 0.000152000                  |                  |                                                                     | (543 <sup>1</sup> ; 596 <sup>3</sup> ; 790 <sup>3</sup> ; 1263 <sup>3</sup> ; 1700 <sup>3</sup> ; 359 <sup>3</sup> ) |           |           |
|                                                          | 8                           | -1.056180000 | 0.257711000  | 0.000011000                  |                  |                                                                     |                                                                                                                      |           |           |
| <b>CH<sub>2</sub>=N-NO</b><br>(C <sub>s</sub> )          | 6                           | 1.040657000  | -1.219867000 | 0.000000000                  | -224.019303      | 0.036238                                                            | 83.1868                                                                                                              | 399.1837  | 538.5469  |
|                                                          | 1                           | 1.922918000  | -0.576372000 | 0.000000000                  |                  |                                                                     | 701.0159                                                                                                             | 810.5176  | 1107.7043 |
|                                                          | 1                           | 1.173956000  | -2.296723000 | 0.000000000                  |                  |                                                                     | 1195.2813                                                                                                            | 1438.7415 | 1667.3048 |
|                                                          | 7                           | -0.135712000 | -0.745503000 | 0.000000000                  |                  |                                                                     | 1747.3616                                                                                                            | 3045.6742 | 3172.2790 |
|                                                          | 7                           | 0.000000000  | 0.744519000  | 0.000000000                  |                  |                                                                     |                                                                                                                      |           |           |
|                                                          | 8                           | -1.048854000 | 1.274899000  | 0.000000000                  |                  |                                                                     |                                                                                                                      |           |           |
| <b>H<sub>2</sub>O</b><br>(C <sub>2v</sub> )              | 8                           | 0.000000000  | 0.000000000  | 0.117686000                  | -76.483030       | 0.021279                                                            | 1639.4030                                                                                                            | 3800.3529 | 3900.7184 |
|                                                          | 1                           | 0.000000000  | 0.760236000  | -0.470746000                 |                  |                                                                     | (1595 <sup>1</sup> ; 3657 <sup>1</sup> ; 3756 <sup>4</sup> )                                                         |           |           |
|                                                          | 1                           | 0.000000000  | -0.760236000 | -0.470746000                 |                  |                                                                     |                                                                                                                      |           |           |
| <b>CH<sub>3</sub>NNO</b><br>(trans)<br>(C <sub>s</sub> ) | 6                           | -1.673287000 | 0.149494000  | 0.000002000                  | -224.624471      | 0.048858                                                            | 121.3550                                                                                                             | 344.7110  | 347.1287  |
|                                                          | 1                           | -1.590055000 | 1.235940000  | 0.000001000                  |                  |                                                                     | 660.4835                                                                                                             | 996.1279  | 1122.7354 |
|                                                          | 1                           | -2.224545000 | -0.177452000 | 0.881334000                  |                  |                                                                     | 1135.8183                                                                                                            | 1374.4655 | 1436.8226 |
|                                                          | 1                           | -2.224550000 | -0.177454000 | -0.881326000                 |                  |                                                                     | 1479.3916                                                                                                            | 1501.4367 | 1680.4903 |
|                                                          | 7                           | -0.369196000 | -0.514361000 | 0.000001000                  |                  |                                                                     | 3032.5543                                                                                                            | 3100.5697 | 3112.1887 |
|                                                          | 7                           | 0.610512000  | 0.232155000  | 0.000001000                  |                  |                                                                     |                                                                                                                      |           |           |
|                                                          | 8                           | 1.798708000  | 0.024681000  | -0.000004000                 |                  |                                                                     |                                                                                                                      |           |           |
| <b>OH</b><br>(C <sub>∞v</sub> )                          | 8                           | 0.000000000  | 0.000000000  | 0.108292000                  | -75.782257       | 0.008425                                                            | 3698.2530 (3738) <sup>4</sup>                                                                                        |           |           |
|                                                          | 1                           | 0.000000000  | 0.000000000  | -0.866334000                 |                  |                                                                     |                                                                                                                      |           |           |
| <b>CH<sub>3</sub>NNO</b><br>(cis)<br>(C <sub>s</sub> )   | 6                           | 1.376586000  | -0.408293000 | -0.000115000                 | -224.619274      | 0.048549                                                            | 38.0957                                                                                                              | 260.5562  | 517.7341  |
|                                                          | 1                           | 1.193619000  | -1.017447000 | -0.887491000                 |                  |                                                                     | 785.0130                                                                                                             | 896.3255  | 1058.3773 |
|                                                          | 1                           | 1.194362000  | -1.016931000 | 0.887767000                  |                  |                                                                     | 1122.9139                                                                                                            | 1297.3767 | 1403.6263 |
|                                                          | 1                           | 2.395732000  | -0.038295000 | -0.000626000                 |                  |                                                                     | 1469.9696                                                                                                            | 1483.9767 | 1704.4243 |
|                                                          | 7                           | 0.463987000  | 0.758246000  | -0.000047000                 |                  |                                                                     | 3024.4666                                                                                                            | 3087.3616 | 3160.4760 |
|                                                          | 7                           | -0.720612000 | 0.484991000  | 0.000062000                  |                  |                                                                     |                                                                                                                      |           |           |
|                                                          | 8                           | -1.405856000 | -0.522528000 | 0.000117000                  |                  |                                                                     |                                                                                                                      |           |           |
| <b>HNO<sub>2</sub></b><br>(C <sub>2v</sub> )             | 7                           | 0.000000000  | 0.000000000  | 0.308076000                  | -205.818974      | 0.021858                                                            | 796.5383                                                                                                             | 1060.5053 | 1405.0737 |
|                                                          | 8                           | 0.000000000  | 1.092629000  | -0.219140000                 |                  |                                                                     | 1517.9654                                                                                                            | 1659.3744 | 3154.8788 |
|                                                          | 1                           | 0.000000000  | 0.000000000  | 1.349716000                  |                  |                                                                     |                                                                                                                      |           |           |
|                                                          | 8                           | 0.000000000  | -1.092629000 | -0.219140000                 |                  |                                                                     |                                                                                                                      |           |           |
| <b>CH<sub>3</sub>NHO</b>                                 | 7                           | 0.177988000  | 0.425710000  | -0.057006000                 | -170.481181      | 0.055170                                                            | 148.6300                                                                                                             | 356.9578  | 511.0034  |



| Species                        | Cartesian coordinate (Å) |              |              | $E_{elec}^{0K}$ (Hartree) | ZPE (Hartree) | Unscaled vibrational frequencies <sup>[a]</sup> (cm <sup>-1</sup> ) |                               |           |           |
|--------------------------------|--------------------------|--------------|--------------|---------------------------|---------------|---------------------------------------------------------------------|-------------------------------|-----------|-----------|
| (C <sub>1</sub> )              | 1                        | 0.277701000  | 1.414666000  | 0.161390000               |               |                                                                     | 956.1754                      | 1109.9093 | 1182.7104 |
|                                | 6                        | -1.143596000 | -0.170434000 | 0.009303000               |               |                                                                     | 1389.0299                     | 1444.1976 | 1469.6452 |
|                                | 1                        | -1.888999000 | 0.581749000  | -0.247412000              |               |                                                                     | 1485.9229                     | 1523.3014 | 3008.1934 |
|                                | 1                        | -1.190987000 | -0.991819000 | -0.703689000              |               |                                                                     | 3082.0345                     | 3121.0555 | 3428.2267 |
|                                | 1                        | -1.352352000 | -0.560448000 | 1.009870000               |               |                                                                     |                               |           |           |
|                                | 8                        | 1.221286000  | -0.300190000 | 0.015383000               |               |                                                                     |                               |           |           |
| <b>NO</b><br>(C <sub>∞</sub> ) | 7                        | 0.000000000  | 0.000000000  | -0.611196000              | -129.965112   | 0.004503                                                            | 1976.5303 (1904) <sup>1</sup> |           |           |
|                                | 8                        | 0.000000000  | 0.000000000  | 0.534796000               |               |                                                                     |                               |           |           |

Frequencies in the parentheses (“( )”) are taken from experimental studies.

**Table S2:** High-pressure rate constants for the CH<sub>3</sub>NH + NO<sub>2</sub> system calculated at W1U method<sup>[a]</sup>.

| No. | Reaction                                                                                                                        | $k^{\infty}(T) = A \times T^n \times \exp(-E_a/RT)$ |             |             | $k^{\infty}(T)$ at 298 K <sup>[b]</sup> |
|-----|---------------------------------------------------------------------------------------------------------------------------------|-----------------------------------------------------|-------------|-------------|-----------------------------------------|
|     |                                                                                                                                 | $A$ <sup>[b]</sup>                                  | $n$         | $E_a/R$ (K) |                                         |
| 1   | CH <sub>3</sub> NH + NO <sub>2</sub> → CH <sub>3</sub> NHNO <sub>2</sub> ( <b>I1</b> ) <sup>[c]</sup><br>(reverse reaction)     | 8.768E-012                                          | -3.419E-002 | -3.144E+002 | 2.073E-011                              |
|     |                                                                                                                                 | 9.580E+023                                          | -2.128E+000 | 2.620E+004  | 3.516E-020                              |
| 2   | CH <sub>3</sub> NH + NO <sub>2</sub> → CH <sub>3</sub> NH-ONO_cis ( <b>I4</b> ) <sup>[c]</sup><br>(reverse reaction)            | 4.055E-013                                          | 1.888E-001  | -7.851E+002 | 1.657E-011                              |
|     |                                                                                                                                 | 1.517E+023                                          | -2.463E+000 | 1.517E+004  | 9.844E-006                              |
| 3   | CH <sub>3</sub> NH + NO <sub>2</sub> → CH <sub>3</sub> NH-ONO_trans ( <b>I5</b> ) <sup>[c]</sup><br>(reverse reaction)          | 4.055E-013                                          | 1.888E-001  | -7.851E+002 | 1.657E-011                              |
|     |                                                                                                                                 | 1.512E+023                                          | -2.494E+000 | 1.478E+004  | 2.999E-005                              |
| 4   | CH <sub>3</sub> NH-ONO_cis ( <b>I4</b> ) → CH <sub>3</sub> NHO + NO ( <b>P6</b> ) <sup>[c]</sup><br>(reverse reaction)          | 1.607E+018                                          | -1.052E+000 | 5.999E+003  | 7.360E+006                              |
|     |                                                                                                                                 | 3.490E-017                                          | 1.382E+000  | -8.241E+002 | 1.460E-012                              |
| 5   | CH <sub>3</sub> NH-ONO_trans ( <b>I5</b> ) → CH <sub>3</sub> NHO + NO ( <b>P6</b> ) <sup>[c]</sup><br>(reverse reaction)        | 1.601E+018                                          | -1.083E+000 | 5.610E+003  | 2.242E+007                              |
|     |                                                                                                                                 | 3.490E-017                                          | 1.382E+000  | -8.241E+002 | 1.460E-012                              |
| 6   | CH <sub>3</sub> N-N(O)OH_trans ( <b>I2</b> ) → CH <sub>3</sub> N-NO_cis + OH ( <b>P4</b> ) <sup>[c]</sup><br>(reverse reaction) | 5.073E+020                                          | -1.608E+000 | 2.725E+004  | 1.062E-023                              |
|     |                                                                                                                                 | 2.047E-012                                          | 1.065E-001  | -8.977E+001 | 5.077E-012                              |
| 7   | CH <sub>3</sub> N-N(O)OH_cis ( <b>I3</b> ) → CH <sub>3</sub> N-NO_trans + OH ( <b>P3</b> ) <sup>[c]</sup>                       | 1.744E+022                                          | -2.019E+000 | 2.436E+004  | 5.852E-019                              |

|    |                                                                                                                                            |                          |                            |                          |                          |
|----|--------------------------------------------------------------------------------------------------------------------------------------------|--------------------------|----------------------------|--------------------------|--------------------------|
|    | (reverse reaction)                                                                                                                         | 2.087E-012               | 1.206E-001                 | -1.458E+002              | 6.764E-012               |
| 8  | <b>PC1</b> → CH <sub>2</sub> =NH + HO-NO ( <b>P1</b> ) <sup>[c]</sup><br>(reverse reaction)                                                | 4.647E+024<br>1.046E-009 | -2.912E+000<br>-1.682E-001 | 5.122E+003<br>8.545E-001 | 1.010E+010<br>4.000E-010 |
| 9  | <b>PC2</b> → CH <sub>2</sub> =NNO + H <sub>2</sub> O ( <b>P2</b> ) <sup>[c]</sup><br>(reverse reaction)                                    | 4.537E+023<br>1.046E-009 | -3.113E+000<br>-1.682E-001 | 1.473E+003<br>8.545E-001 | 6.442E+013<br>4.000E-010 |
| 10 | CH <sub>3</sub> NHNO <sub>2</sub> ( <b>I1</b> ) → CH <sub>3</sub> N-N(O)OH_trans ( <b>I2</b> ) (via <b>TS1</b> )<br>(reverse reaction)     | 1.126E-005<br>1.811E-005 | 5.340E+000<br>5.044E+000   | 1.192E+004<br>8.572E+003 | 1.269E-009<br>2.861E-005 |
| 11 | CH <sub>3</sub> NHNO <sub>2</sub> ( <b>I1</b> ) → <b>PC1</b> (via <b>TS2</b> )<br>(reverse reaction)                                       | 1.496E+000<br>2.677E+000 | 3.949E+000<br>3.048E+000   | 2.163E+004<br>2.462E+004 | 3.613E-022<br>1.644E-028 |
| 12 | CH <sub>3</sub> N-N(O)OH_trans ( <b>I2</b> ) → <b>PC1</b> (via <b>TS3</b> )<br>(reverse reaction)                                          | 3.489E+010<br>3.883E+010 | 1.297E+000<br>6.915E-001   | 3.767E+004<br>4.401E+004 | 7.298E-042<br>1.473E-052 |
| 13 | CH <sub>3</sub> N-N(O)OH_trans ( <b>I2</b> ) → CH <sub>3</sub> N-N(O)OH_cis ( <b>I3</b> ) (via <b>TS4</b> )<br>(reverse reaction)          | 1.398E-001<br>6.106E+000 | 3.868E+000<br>3.447E+000   | 8.608E+003<br>7.256E+003 | 2.082E-004<br>7.808E-002 |
| 14 | CH <sub>3</sub> N-N(O)OH_trans ( <b>I2</b> ) → CH <sub>3</sub> N-N(O)OH_cis ( <b>I3</b> ) (via <b>TS5</b> )<br>(reverse reaction)          | 8.689E+011<br>2.252E+013 | 3.827E-001<br>2.868E-002   | 1.771E+004<br>1.631E+004 | 2.405E-026<br>1.104E-022 |
| 15 | CH <sub>3</sub> N-N(O)OH_cis ( <b>I3</b> ) → <b>PC2</b> (via <b>TS6</b> )<br>(reverse reaction)                                            | 8.929E-001<br>3.656E-003 | 4.099E+000<br>3.498E+000   | 1.723E+004<br>2.401E+004 | 1.403E-015<br>2.301E-029 |
| 16 | CH <sub>3</sub> NHNO <sub>2</sub> ( <b>I1</b> ) → CH <sub>3</sub> NH-ONO_trans ( <b>I5</b> ) (via <b>TS7</b> )<br>(reverse reaction)       | 2.004E+009<br>6.837E+009 | 1.631E+000<br>1.042E+000   | 3.926E+004<br>2.831E+004 | 1.391E-044<br>1.484E-029 |
| 17 | CH <sub>3</sub> NH-ONO_trans ( <b>I5</b> ) → CH <sub>2</sub> =NH + H-NO <sub>2</sub> ( <b>P5</b> ) (via <b>TS8</b> )<br>(reverse reaction) | 2.037E+010<br>5.622E-025 | 6.091E-001<br>3.450E+000   | 1.736E+004<br>2.206E+004 | 3.235E-014<br>1.347E-048 |
| 18 | CH <sub>3</sub> NH-ONO_cis ( <b>I4</b> ) → <b>PC1</b> (via <b>TS9</b> )<br>(reverse reaction)                                              | 5.117E+004<br>2.675E+004 | 2.421E+000<br>2.077E+000   | 2.207E+004<br>3.563E+004 | 3.926E-022<br>5.101E-043 |
| 19 | CH <sub>3</sub> NH-ONO_cis ( <b>I4</b> ) → CH <sub>3</sub> NH-ONO_trans ( <b>I5</b> ) (via <b>TS10</b> )<br>(reverse reaction)             | 5.463E+011<br>5.445E+011 | 5.513E-001<br>5.199E-001   | 5.476E+003<br>5.087E+003 | 1.342E+005<br>4.090E+005 |

<sup>[a]</sup> Rate constants are valid for 298–2000 K. <sup>[b]</sup> Units of [s<sup>-1</sup>] for first-order reactions and [cm<sup>3</sup> molecule<sup>-1</sup> s<sup>-1</sup>] for second-order reactions.

This work calculated at the composite W1U method including asymmetric Eckart tunneling, HIR treatments and symmetry reactions.

<sup>[c]</sup> Barrierless channels, see the main text for details.

**Table S3:**  $k(T, P)_{\text{tot}}$  (overall rate constants) for the  $\text{CH}_3\text{NH} + \text{NO}_2 \rightarrow \text{products}$ , calculated at different pressures.

| T (K) | $k(T, P)_{\text{tot}}$ ( $\text{cm}^3/\text{molecule/s}$ ) |          |          |          |           |            |
|-------|------------------------------------------------------------|----------|----------|----------|-----------|------------|
|       | 0.76 torr                                                  | 7.6 torr | 76 torr  | 760 torr | 7600 torr | 76000 torr |
| 298   | 4.52E-11                                                   | 5.17E-11 | 5.29E-11 | 5.33E-11 | 5.37E-11  | 5.38E-11   |
| 300   | 4.45E-11                                                   | 5.10E-11 | 5.22E-11 | 5.26E-11 | 5.30E-11  | 5.32E-11   |
| 400   | 2.25E-11                                                   | 3.00E-11 | 3.27E-11 | 3.32E-11 | 3.34E-11  | 3.35E-11   |
| 500   | 1.42E-11                                                   | 1.99E-11 | 2.45E-11 | 2.55E-11 | 2.57E-11  | 2.59E-11   |
| 600   | 1.05E-11                                                   | 1.37E-11 | 1.93E-11 | 2.14E-11 | 2.18E-11  | 2.19E-11   |
| 700   | 8.69E-12                                                   | 1.01E-11 | 1.49E-11 | 1.86E-11 | 1.94E-11  | 1.95E-11   |
| 800   | 7.66E-12                                                   | 8.23E-12 | 1.13E-11 | 1.60E-11 | 1.76E-11  | 1.79E-11   |
| 900   | 6.99E-12                                                   | 7.22E-12 | 8.80E-12 | 1.33E-11 | 1.62E-11  | 1.67E-11   |
| 1000  | 6.54E-12                                                   | 6.63E-12 | 7.33E-12 | 1.06E-11 | 1.47E-11  | 1.58E-11   |
| 1100  | 6.21E-12                                                   | 6.25E-12 | 6.54E-12 | 8.40E-12 | 1.28E-11  | 1.50E-11   |
| 1200  | 5.96E-12                                                   | 5.97E-12 | 6.08E-12 | 6.97E-12 | 1.06E-11  | 1.40E-11   |
| 1300  | 5.75E-12                                                   | 5.75E-12 | 5.79E-12 | 6.16E-12 | 8.48E-12  | 1.28E-11   |
| 1400  | 5.58E-12                                                   | 5.57E-12 | 5.59E-12 | 5.72E-12 | 6.87E-12  | 1.11E-11   |
| 1500  | 5.42E-12                                                   | 5.41E-12 | 5.42E-12 | 5.46E-12 | 5.93E-12  | 8.97E-12   |
| 1600  | 5.27E-12                                                   | 5.26E-12 | 5.27E-12 | 5.28E-12 | 5.44E-12  | 7.07E-12   |
| 1700  | 5.14E-12                                                   | 5.14E-12 | 5.13E-12 | 5.14E-12 | 5.18E-12  | 5.86E-12   |
| 1800  | 5.02E-12                                                   | 5.02E-12 | 5.02E-12 | 5.03E-12 | 5.04E-12  | 5.27E-12   |
| 1900  | 4.94E-12                                                   | 4.95E-12 | 4.95E-12 | 4.95E-12 | 4.95E-12  | 5.03E-12   |
| 2000  | 4.89E-12                                                   | 4.89E-12 | 4.89E-12 | 4.89E-12 | 4.90E-12  | 4.93E-12   |

**Table S4:** T1 diagnostics for the species involved in CH<sub>3</sub>NH + NO<sub>2</sub> reaction computed at CCSD(T)/cc-pVQZ based on the B3LYP/cc-pVTZ+d and M06-2X/cc-pVTZ+d geometries.

| No. | Species                               | T1 diagnostics    |                   |
|-----|---------------------------------------|-------------------|-------------------|
|     |                                       | B3LYP/cc-pVTZ+d   | M06-2X/cc-pVTZ+d  |
| 1   | CH <sub>3</sub> NH                    | 0.01335086        | 0.01327600        |
| 2   | NO <sub>2</sub>                       | 0.02375747        | 0.02303088        |
| 3   | <b>I1</b>                             | 0.01653630        | 0.01610682        |
| 4   | <b>I2</b>                             | 0.01580088        | 0.01537740        |
| 5   | <b>I3</b>                             | 0.01720916        | 0.01647766        |
| 6   | <b>I4</b>                             | <b>0.02218522</b> | 0.01989297        |
| 7   | <b>I5</b>                             | 0.01918596        | 0.01806648        |
| 8   | <b>TS1</b>                            | 0.01801579        | 0.01745645        |
| 9   | <b>TS2</b>                            | <b>0.02619867</b> | <b>0.02402151</b> |
| 10  | <b>TS3</b>                            | <b>0.02078098</b> | <b>0.02077468</b> |
| 11  | <b>TS4</b>                            | 0.01789687        | 0.01734725        |
| 12  | <b>TS5</b>                            | 0.01837344        | 0.01734336        |
| 13  | <b>TS6</b>                            | <b>0.02182776</b> | <b>0.02127202</b> |
| 14  | <b>TS7</b>                            | <b>0.05081448</b> | <b>0.05146866</b> |
| 15  | <b>TS8</b>                            | <b>0.03569021</b> | <b>0.03172304</b> |
| 16  | <b>TS9</b>                            | <b>0.02743051</b> | <b>0.02285567</b> |
| 17  | <b>TS10</b>                           | 0.01672695        | 0.01587366        |
| 18  | <b>PC1</b>                            | 0.01823907        | 0.01770982        |
| 19  | <b>PC2</b>                            | 0.01666078        | 0.01639753        |
| 20  | CH <sub>2</sub> =NH                   | 0.01199711        | 0.01191721        |
| 21  | HO-NO                                 | 0.02083094        | 0.02003886        |
| 22  | CH <sub>2</sub> =NNO                  | 0.01694887        | 0.01648308        |
| 23  | H <sub>2</sub> O                      | 0.00740894        | 0.00736938        |
| 24  | CH <sub>2</sub> N-NO ( <i>trans</i> ) | <b>0.04787236</b> | <b>0.04538593</b> |
| 25  | OH                                    | 0.00803902        | 0.00799882        |
| 26  | CH <sub>2</sub> N-NO ( <i>cis</i> )   | 0.04237074        | 0.04121106        |
| 27  | H-NO <sub>2</sub>                     | 0.01970569        | 0.01918845        |
| 28  | CH <sub>3</sub> NHO                   | 0.02006362        | 0.01936007        |
| 29  | NO                                    | 0.02475097        | 0.02166677        |

Numbers in bold type are greater than the critical value.

**Table S5:** Detailed kinetic submechanism in NASA format for the reaction  $\text{CH}_3\text{NH} + \text{NO}_2$ .

|                  |                  |                  |                  |                  |          |   |  |
|------------------|------------------|------------------|------------------|------------------|----------|---|--|
| <b>ch3nh</b>     | N 1H 4C 1        | G                | 300.000          | 2500.000         | 1500.000 | 1 |  |
| 2.36094664E+001  | -3.71092656E-002 | 2.53992603E-005  | -7.54974081E-009 | 8.21570071E-013  | 2        |   |  |
| -3.63128071E+003 | -9.56573966E+001 | 3.64703306E+000  | 4.64647258E-004  | -9.51964453E-007 | 3        |   |  |
| 7.89581153E-010  | -2.26233476E-013 | 4.74614762E+003  | 1.55757677E+001  |                  | 4        |   |  |
| <b>no2</b>       | N 1O 2           | G                | 300.000          | 2500.000         | 1500.000 | 1 |  |
| -5.88599089E+001 | 1.23621161E-001  | -9.36405727E-005 | 3.11761251E-008  | -3.84976273E-012 | 2        |   |  |
| 2.42265809E+004  | 3.38016068E+002  | 1.76010733E+000  | -2.85565278E-004 | 5.36983231E-008  | 3        |   |  |
| 3.64188179E-010  | -2.18943331E-013 | 7.50711074E+002  | 5.19962282E+000  |                  | 4        |   |  |
| <b>il</b>        | C 1H 4N 2O 2G    | 300.000          | 2500.000         | 1500.000         | 1        |   |  |
| -3.92405559E+002 | 8.13960917E-001  | -6.17205852E-004 | 2.05791015E-007  | -2.54594826E-011 | 2        |   |  |
| 1.53740901E+005  | 2.21685994E+003  | 4.22553242E+000  | 9.70356752E-003  | -1.85390982E-005 | 3        |   |  |
| 1.40028702E-008  | -3.67474521E-012 | -3.38607675E+002 | 3.72407915E+001  |                  | 4        |   |  |
| <b>i2</b>        | C 1H 4N 2O 2G    | 300.000          | 2500.000         | 1500.000         | 1        |   |  |
| 1.03397417E+002  | -2.15869573E-001 | 1.76293076E-004  | -6.30414463E-008 | 8.33661059E-012  | 2        |   |  |
| -3.44135271E+004 | -4.99963486E+002 | 5.67980938E+000  | 1.25027446E-003  | -1.79918236E-006 | 3        |   |  |
| 5.50244420E-010  | 9.63041046E-014  | 2.35832717E+002  | 2.81949400E+001  |                  | 4        |   |  |
| <b>i3</b>        | C 1H 4N 2O 2G    | 300.000          | 2500.000         | 1500.000         | 1        |   |  |
| 1.37943692E+002  | -2.88744451E-001 | 2.32666275E-004  | -8.18076531E-008 | 1.05909370E-011  | 2        |   |  |
| -4.69019690E+004 | -6.88530352E+002 | 5.18209331E+000  | 3.58806690E-003  | -6.96858913E-006 | 3        |   |  |
| 6.28410125E-009  | -2.01876737E-012 | 6.79397377E+002  | 3.03733180E+001  |                  | 4        |   |  |
| <b>i4</b>        | C 1H 4N 2O 2G    | 300.000          | 2500.000         | 1500.000         | 1        |   |  |
| -7.68397949E+002 | 1.54441780E+000  | -1.14102085E-003 | 3.70105295E-007  | -4.44745617E-011 | 2        |   |  |
| 3.08695818E+005  | 4.30001822E+003  | 2.88905943E+000  | 2.21221254E-002  | -5.22851196E-005 | 3        |   |  |
| 4.76540168E-008  | -1.47532211E-011 | 2.27924060E+003  | 4.30515549E+001  |                  | 4        |   |  |
| <b>i5</b>        | C 1H 4N 2O 2G    | 300.000          | 2500.000         | 1500.000         | 1        |   |  |
| -3.31904046E+002 | 7.00446400E-001  | -5.39775247E-004 | 1.83195567E-007  | -2.31110343E-011 | 2        |   |  |
| 1.31231227E+005  | 1.87777571E+003  | 5.08742168E+000  | 6.64249269E-003  | -1.48925879E-005 | 3        |   |  |
| 1.26874381E-008  | -3.67971850E-012 | 2.06602778E+003  | 3.07229972E+001  |                  | 4        |   |  |
| <b>pc1</b>       | C 1H 4N 2O 2G    | 300.000          | 2500.000         | 1500.000         | 1        |   |  |
| 1.24512701E+003  | -2.60118239E+000 | 2.02460947E-003  | -6.92741918E-007 | 8.79453679E-011  | 2        |   |  |
| -4.68119240E+005 | -6.73626727E+003 | 3.00658883E+000  | 2.18581717E-002  | -5.11761432E-005 | 3        |   |  |
| 4.62529304E-008  | -1.40426980E-011 | -1.06515150E+003 | 4.59926020E+001  |                  | 4        |   |  |
| <b>pc2</b>       | C 1H 4N 2O 2G    | 300.000          | 2500.000         | 1500.000         | 1        |   |  |
| -7.56023010E+002 | 1.51860504E+000  | -1.12114138E-003 | 3.62735550E-007  | -4.33370667E-011 | 2        |   |  |
| 3.01455561E+005  | 4.23493499E+003  | -1.91266493E-001 | 3.69463585E-002  | -7.44742502E-005 | 3        |   |  |
| 6.04674673E-008  | -1.71462906E-011 | -4.93303429E+002 | 5.90302789E+001  |                  | 4        |   |  |
| <b>ts1</b>       | C 1H 4N 2O 2G    | 300.000          | 2500.000         | 1500.000         | 1        |   |  |
| 2.46499559E+002  | -5.26032086E-001 | 4.26480342E-004  | -1.52023359E-007 | 2.00945884E-011  | 2        |   |  |
| -8.38091354E+004 | -1.27798001E+003 | 3.59831735E+000  | 1.17295228E-002  | -2.30535248E-005 | 3        |   |  |
| 1.81874407E-008  | -4.95208027E-012 | 3.91519165E+003  | 3.77144509E+001  |                  | 4        |   |  |
| <b>ts2</b>       | N 2H 4C 1O 2G    | 300.000          | 2500.000         | 1500.000         | 1        |   |  |
| -1.70342718E+002 | 3.51107362E-001  | -2.59829345E-004 | 8.45654171E-008  | -1.02157468E-011 | 2        |   |  |
| 7.53280081E+004  | 1.00222841E+003  | 4.35028250E+000  | 7.71090005E-003  | -1.50197973E-005 | 3        |   |  |
| 1.20770782E-008  | -3.42640788E-012 | 5.58178283E+003  | 3.72681668E+001  |                  | 4        |   |  |
| <b>ts3</b>       | C 1H 4N 2O 2G    | 300.000          | 2500.000         | 1500.000         | 1        |   |  |
| -2.50349909E+001 | 7.96080172E-002  | -7.78724227E-005 | 3.32413224E-008  | -5.17833066E-012 | 2        |   |  |
| 1.93035353E+004  | 1.94581960E+002  | 3.96458189E+000  | 1.04311371E-002  | -2.32345421E-005 | 3        |   |  |
| 2.24230884E-008  | -7.60189881E-012 | 9.42349940E+003  | 3.99627062E+001  |                  | 4        |   |  |

|                     |                                                                                |   |
|---------------------|--------------------------------------------------------------------------------|---|
| <b>ts4</b>          | C 1H 4N 2O 2G 300.000 2500.000 1500.000 1                                      |   |
|                     | -1.17943288E+0022.35153479E-001-1.64371087E-0045.00469022E-008-5.60269919E-012 | 2 |
|                     | 5.42166910E+0047.15268896E+0025.15658690E+0002.44878166E-003-4.52674219E-006   | 3 |
|                     | 3.91320340E-009-1.25619528E-0123.43053227E+0033.07161884E+001                  | 4 |
| <b>ts5</b>          | C 1H 4N 2O 2G 300.000 2500.000 1500.000 1                                      |   |
|                     | 1.71662281E+002-3.33450141E-0012.49052509E-004-8.21235329E-0081.00907164E-011  | 2 |
|                     | -6.09679342E+004-8.88676197E+0027.26883553E+000-8.89637369E-0031.65695047E-005 | 3 |
|                     | -1.26432280E-0083.36065769E-0124.22500668E+0031.85657172E+001                  | 4 |
| <b>ts6</b>          | C 1H 4N 2O 2G 300.000 2500.000 1500.000 1                                      |   |
|                     | 2.05461380E+002-4.33048877E-0013.49805963E-004-1.24742465E-0071.65509478E-011  | 2 |
|                     | -6.75953739E+004-1.05355188E+0033.86616246E+0001.14707795E-002-2.39748645E-005 | 3 |
|                     | 1.98747348E-008-5.69766979E-0125.77777221E+0033.98156026E+001                  | 4 |
| <b>ts7</b>          | C 1H 4N 2O 2G 300.000 2500.000 1500.000 1                                      |   |
|                     | -3.80105133E+0027.80160390E-001-5.83028755E-0041.90983910E-007-2.31664729E-011 | 2 |
|                     | 1.59295704E+0052.15049103E+0038.35816410E+000-1.65389172E-0023.55152199E-005   | 3 |
|                     | -3.04101118E-0088.84118856E-0128.56915377E+0031.72892020E+001                  | 4 |
| <b>ts8</b>          | N 2H 4C 1O 2G 300.000 2500.000 1500.000 1                                      |   |
|                     | 1.22002187E+002-2.39075891E-0011.80139299E-004-5.89780455E-0087.08462373E-012  | 2 |
|                     | -3.79291996E+004-6.05900299E+0024.78018258E+0005.79818282E-003-1.24953899E-005 | 3 |
|                     | 1.13390760E-008-3.64302792E-0126.38395187E+0033.52115641E+001                  | 4 |
| <b>ts9</b>          | C 1H 4N 2O 2G 300.000 2500.000 1500.000 1                                      |   |
|                     | 7.37170807E+002-1.50376242E+0001.14699550E-003-3.84897490E-0074.79528743E-011  | 2 |
|                     | -2.73624500E+005-3.98002346E+0036.55922740E+000-5.07280497E-0031.05964428E-005 | 3 |
|                     | -9.24862083E-0092.83403898E-0127.62669899E+0032.78899244E+001                  | 4 |
| <b>ts10</b>         | C 1H 4N 2O 2G 300.000 2500.000 1500.000 1                                      |   |
|                     | 1.05881016E+002-1.98095417E-0011.47961565E-004-4.95711427E-0086.28666710E-012  | 2 |
|                     | -3.74652081E+004-5.28216821E+0028.82346780E+000-1.88277633E-0024.02633918E-005 | 3 |
|                     | -3.51657050E-0081.06277475E-0112.80384522E+0031.21612584E+001                  | 4 |
| <b>ch2nh</b>        | C 1H 3N 1 G 300.000 2500.000 1500.000 1                                        |   |
|                     | -9.39305603E+0012.04797018E-001-1.60299404E-0045.51750869E-008-7.04974199E-012 | 2 |
|                     | 3.86014208E+0045.42313103E+0022.55197751E+0003.10135710E-003-5.83869579E-006   | 3 |
|                     | 4.37884517E-009-1.12374682E-0122.31322254E+0031.51409611E+001                  | 4 |
| <b>hono</b>         | N 1O 2H 1 G 300.000 2500.000 1500.000 1                                        |   |
|                     | -4.12055066E+0019.44174575E-002-7.54330867E-0052.63008249E-008-3.37385755E-012 | 2 |
|                     | 1.33721119E+0042.46691256E+0021.49659531E+0005.24363477E-003-1.03999459E-005   | 3 |
|                     | 8.39277637E-009-2.35708515E-012-2.40307944E+0031.38585878E+001                 | 4 |
| <b>ch2n-no</b>      | C 1H 2N 2O 1G 300.000 2500.000 1500.000 1                                      |   |
|                     | -1.71806191E+0023.71430681E-001-2.91701906E-0041.00730689E-007-1.29032475E-011 | 2 |
|                     | 7.20343238E+0049.74844337E+0023.73450234E+000-3.31372516E-0041.29233738E-006   | 3 |
|                     | -1.28513614E-0093.91595288E-0136.29797341E+0031.70677551E+001                  | 4 |
| <b>h2o</b>          | O 1H 2 G 300.000 2500.000 1500.000 1                                           |   |
|                     | 1.43097202E+001-2.52600145E-0021.87552529E-005-6.12899109E-0097.44981245E-013  | 2 |
|                     | -1.23306984E+004-6.61253037E+0011.68470636E+000-9.87178121E-0052.93621280E-007 | 3 |
|                     | -3.70788066E-0101.54189401E-013-7.31059079E+0033.50817262E+000                 | 4 |
| <b>ch3nno_trans</b> | C 1H 3N 2O 1G 300.000 2500.000 1500.000 1                                      |   |
|                     | -7.18734362E+0011.62893716E-001-1.30123553E-0044.59657270E-008-6.04419540E-012 | 2 |
|                     | 3.39843701E+0044.37193889E+0023.72595479E+0004.70056406E-003-1.00350195E-005   | 3 |
|                     | 8.49133691E-009-2.49636313E-0125.44658995E+0032.41465091E+001                  | 4 |
| <b>oh</b>           | O 1H 1 G 300.000 2500.000 1500.000 1                                           |   |

|                    |                  |                  |                  |                  |   |
|--------------------|------------------|------------------|------------------|------------------|---|
| -8.71299428E+002   | 0.05199363E-002  | -1.59169934E-005 | 5.41379613E-009  | -6.81237923E-013 | 2 |
| 4.47522241E+003    | 5.49815819E+001  | 1.15130641E+000  | -4.31118265E-004 | 8.03954153E-007  | 3 |
| -6.00648120E-010   | 1.54093153E-013  | 7.80478086E+002  | 1.16600219E+000  |                  | 4 |
| <b>ch3n-no_cis</b> | C 1H 3N 2O 1G    | 300.000          | 2500.000         | 1500.000         | 1 |
| 1.63324390E+002    | -3.26013269E-001 | 2.49731299E-004  | -8.46764898E-008 | 1.07221657E-011  | 2 |
| -5.59114711E+004   | -8.51022604E+002 | 6.11381500E+000  | -9.92242669E-003 | 2.04574664E-005  | 3 |
| -1.75139730E-008   | 5.24050281E-012  | 5.52638396E+003  | 1.38489954E+001  |                  | 4 |
| <b>hno2</b>        | N 1O 2H 1 G      | 300.000          | 2500.000         | 1500.000         | 1 |
| 7.46590130E+001    | -1.51321194E-001 | 1.17516043E-004  | -4.01508342E-008 | 5.09750568E-012  | 2 |
| -2.88262057E+004   | -3.85537361E+002 | 2.89864675E+000  | -2.71828635E-003 | 4.70910141E-006  | 3 |
| -3.22545234E-009   | 7.56442217E-013  | -1.59377102E+003 | 7.22050382E+000  |                  | 4 |
| <b>ch3nho</b>      | N 1H 4C 1O 1G    | 300.000          | 2500.000         | 1500.000         | 1 |
| -2.21368572E+002   | 4.62096776E-001  | -3.52033150E-004 | 1.18357761E-007  | -1.48237051E-011 | 2 |
| 8.85126202E+004    | 1.26029037E+003  | 3.22305770E+000  | 7.31231885E-003  | -1.46768854E-005 | 3 |
| 1.16888356E-008    | -3.23627891E-012 | 1.07004536E+003  | 2.57469255E+001  |                  | 4 |
| <b>no</b>          | N 1O 1 G         | 300.000          | 2500.000         | 1500.000         | 1 |
| -5.23681623E+000   | 1.44898609E-002  | -1.21967302E-005 | 4.46719534E-009  | -6.01398112E-013 | 2 |
| 4.56534583E+003    | 3.63068566E+001  | 1.13853730E+000  | -4.08437247E-004 | 8.39997620E-007  | 3 |
| -6.81236465E-010   | 1.89560592E-013  | 2.41188677E+003  | 2.15494551E+000  |                  | 4 |

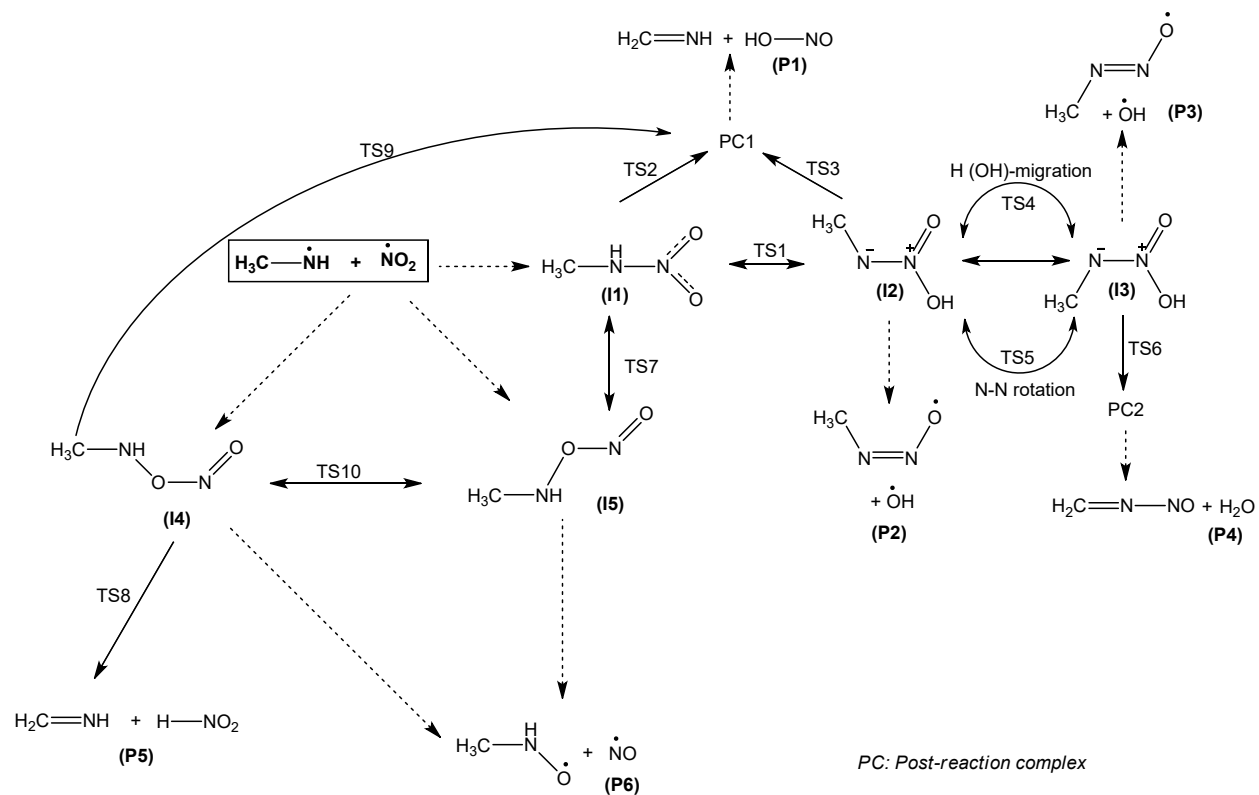

**Figure S1:** Reaction pathway scheme of the  $\text{CH}_3\text{NH} + \text{NO}_2$  reaction. Dashed arrows present the reactions without tight transition states.

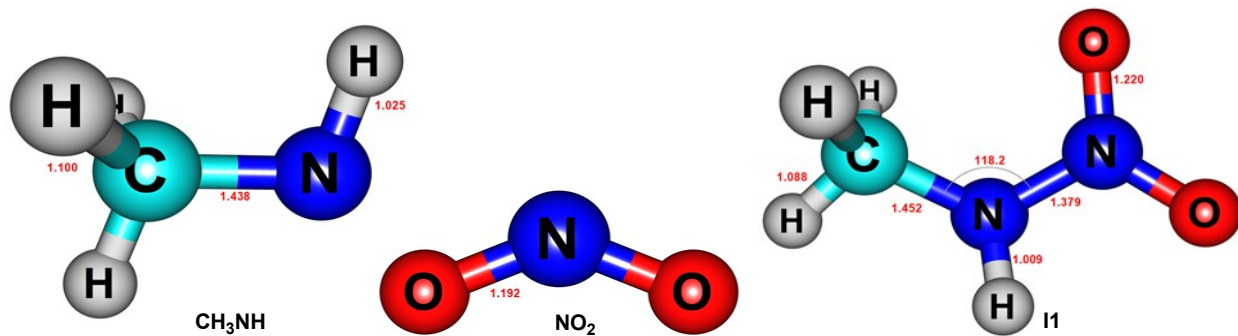



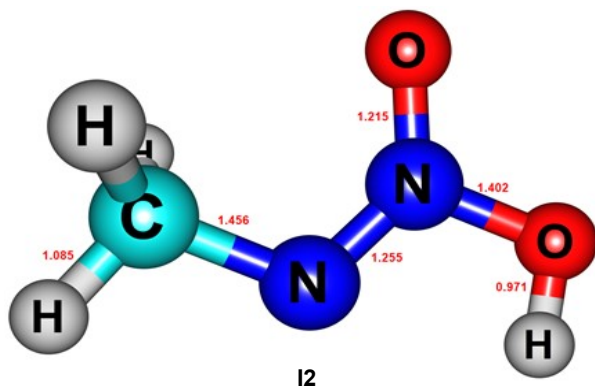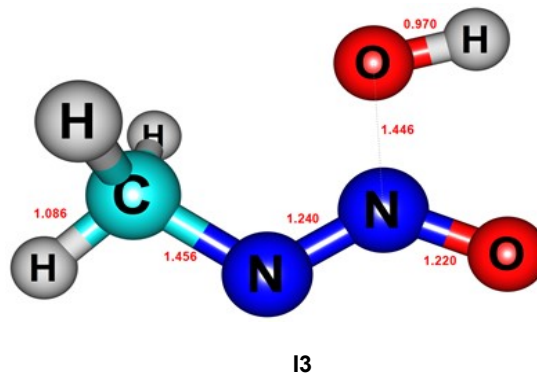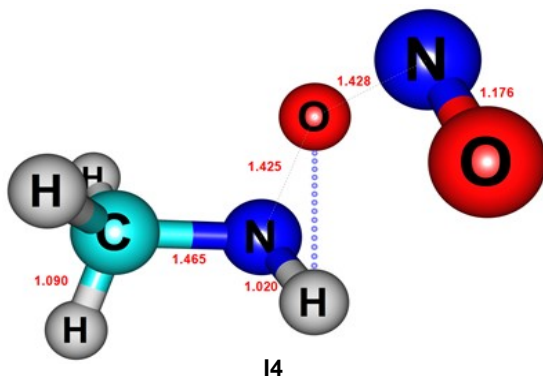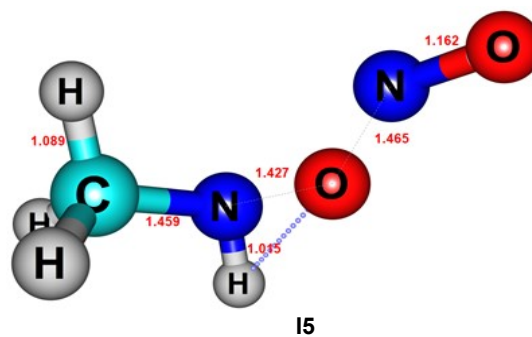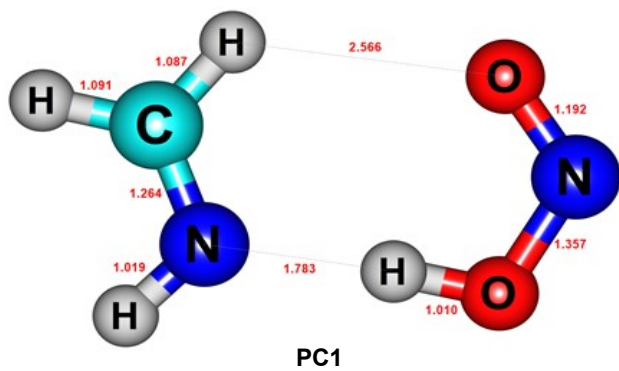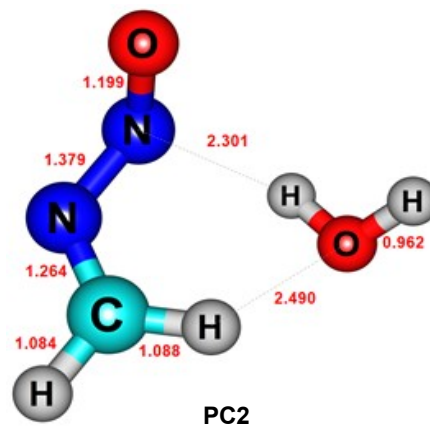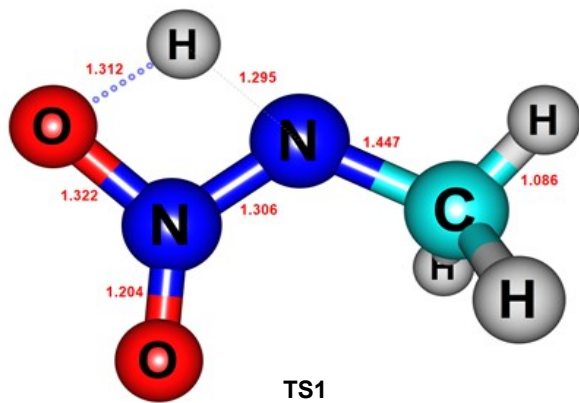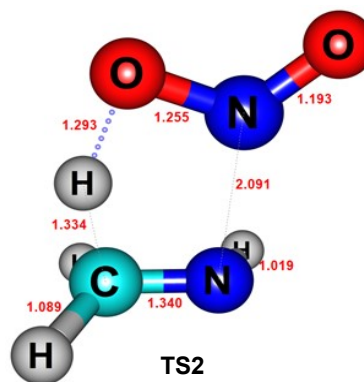

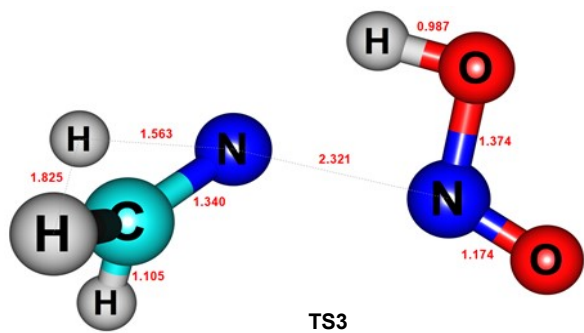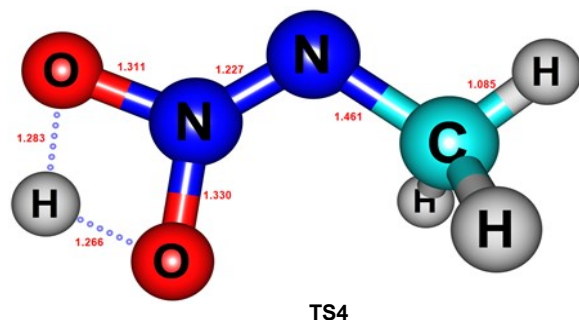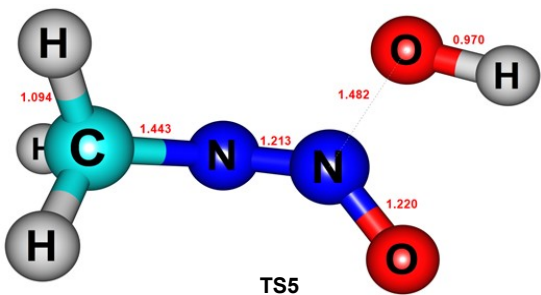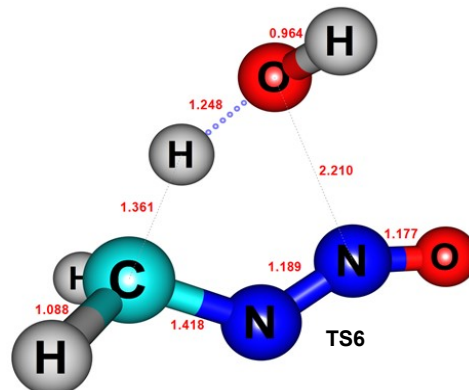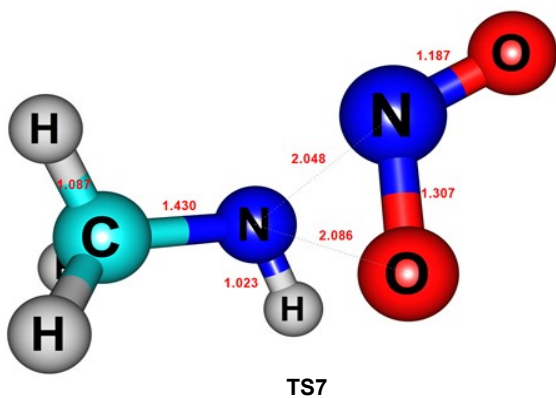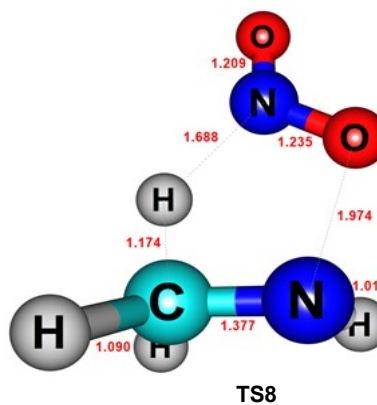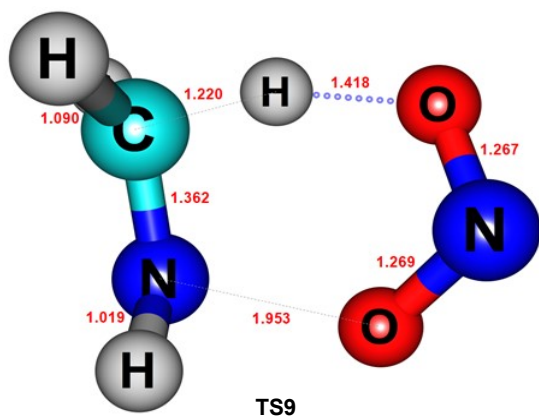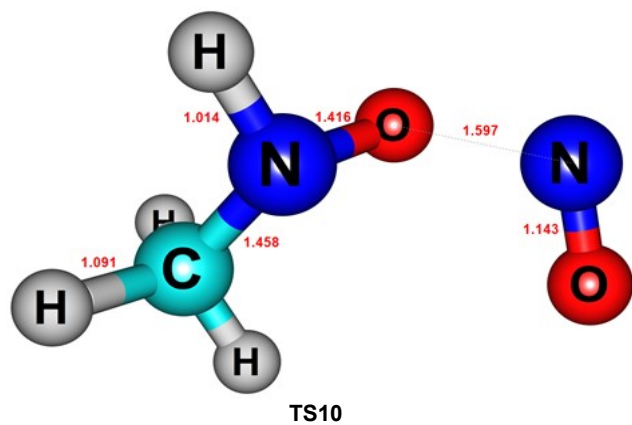

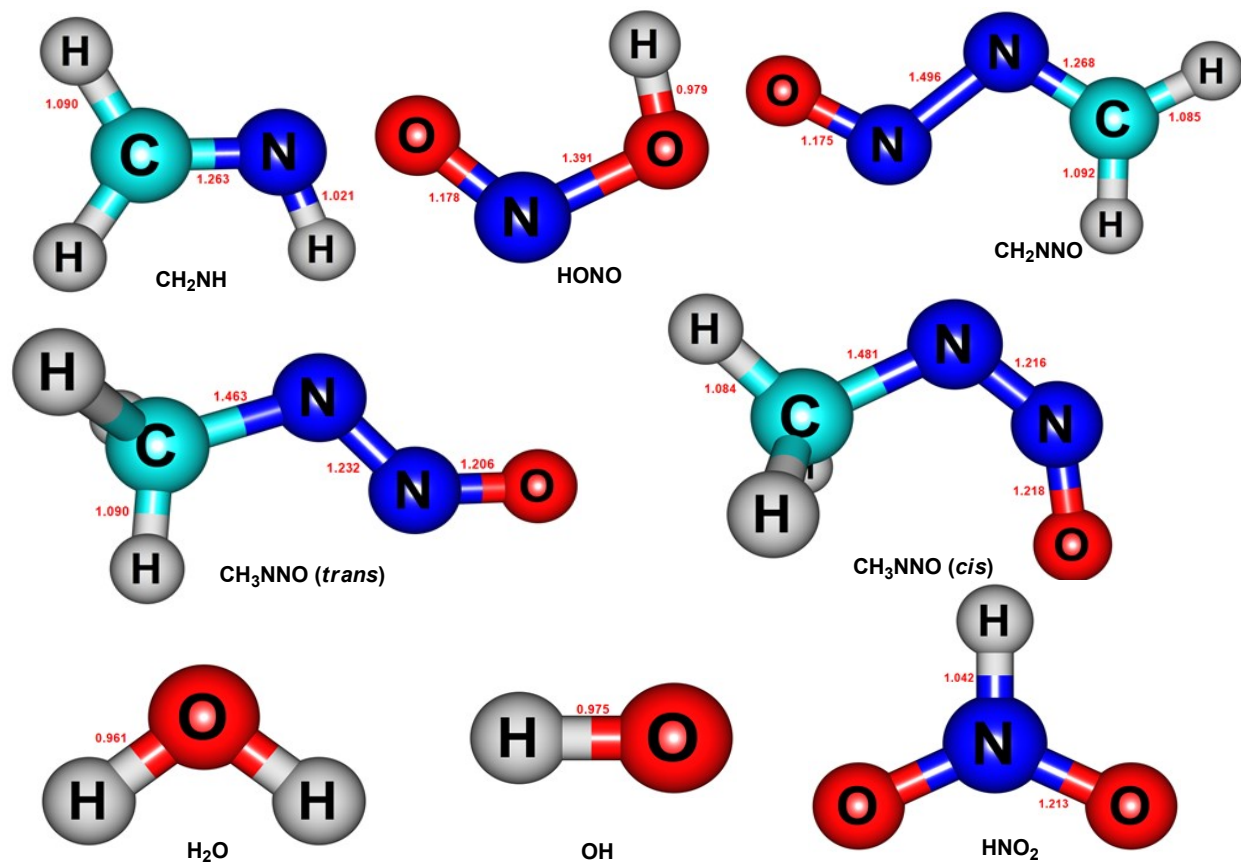

**Figure S2:** B3LYP/cc-pVTZ+d optimized geometries for the species involved in the  $\text{CH}_3\text{NH} + \text{NO}_2$  reaction. All structures were obtained for the lowest-energy conformer of a given species. Bond lengths are in Å.

Species

Potential energy surfaces for the internal rotations

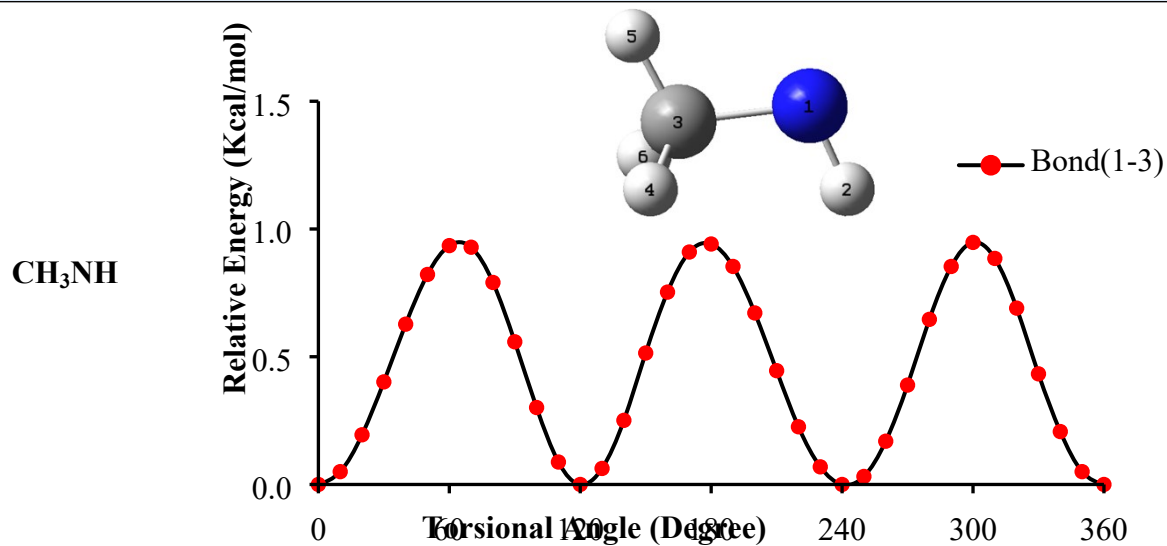

I1

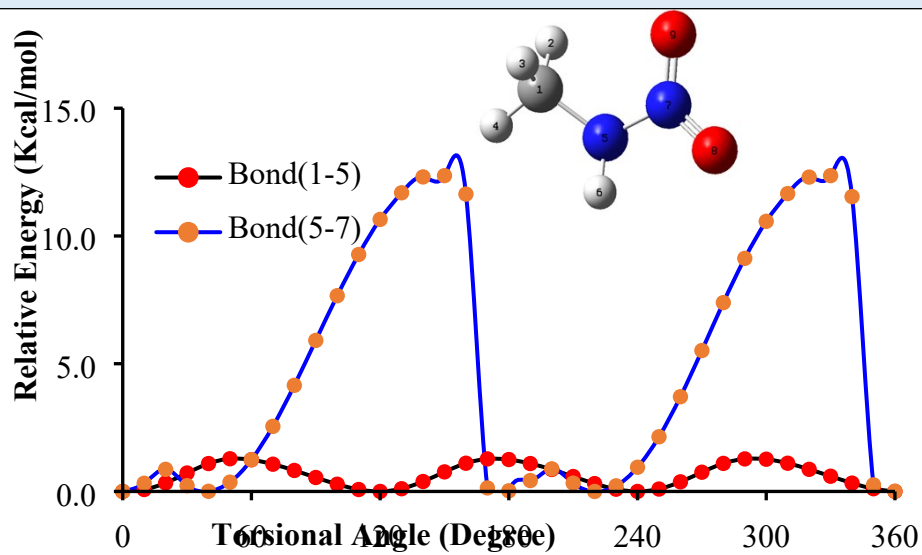

I2

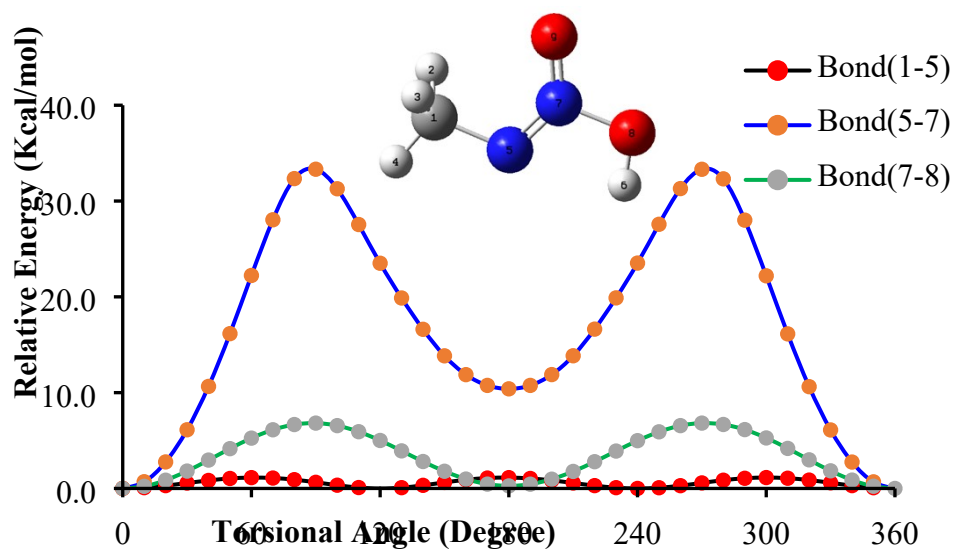

I3

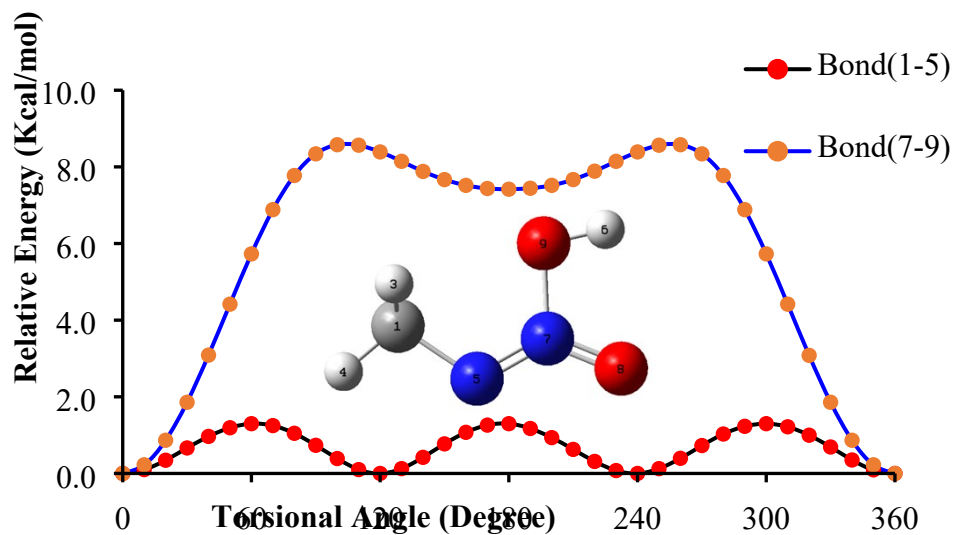

I4

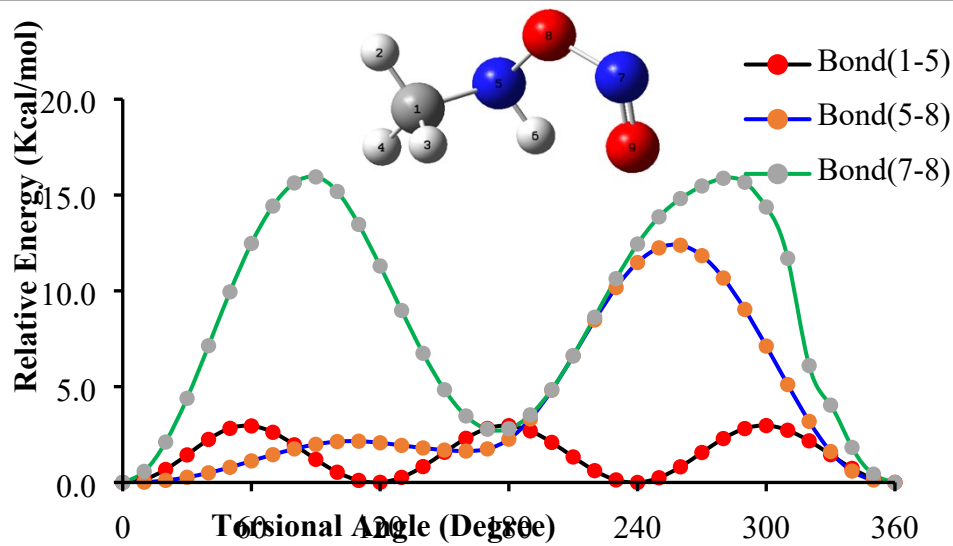

I5

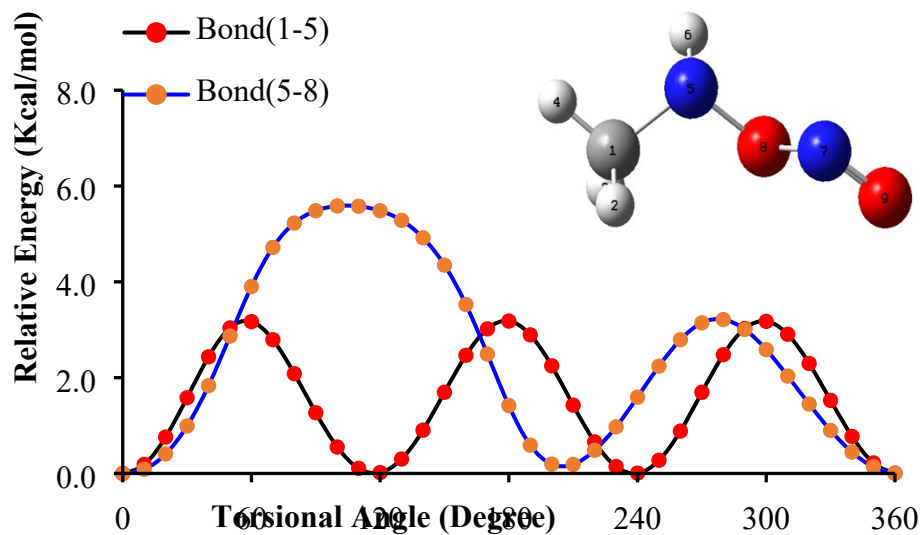

PC2

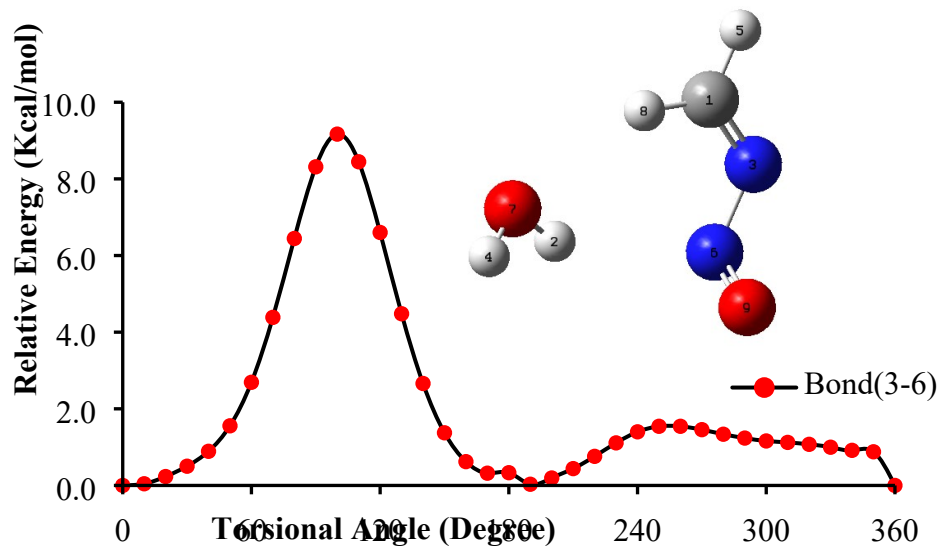

## Species

## Potential energy surfaces for the internal rotations

TS1

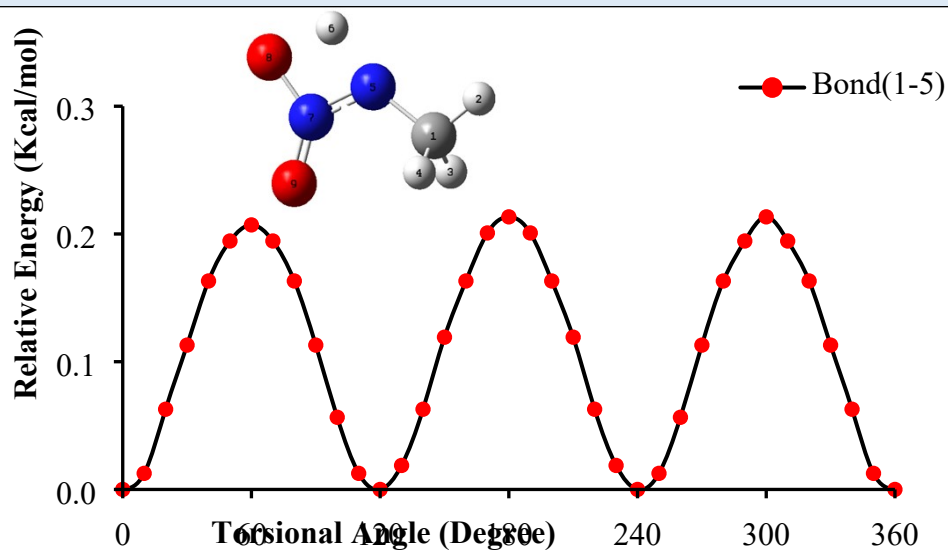

TS4

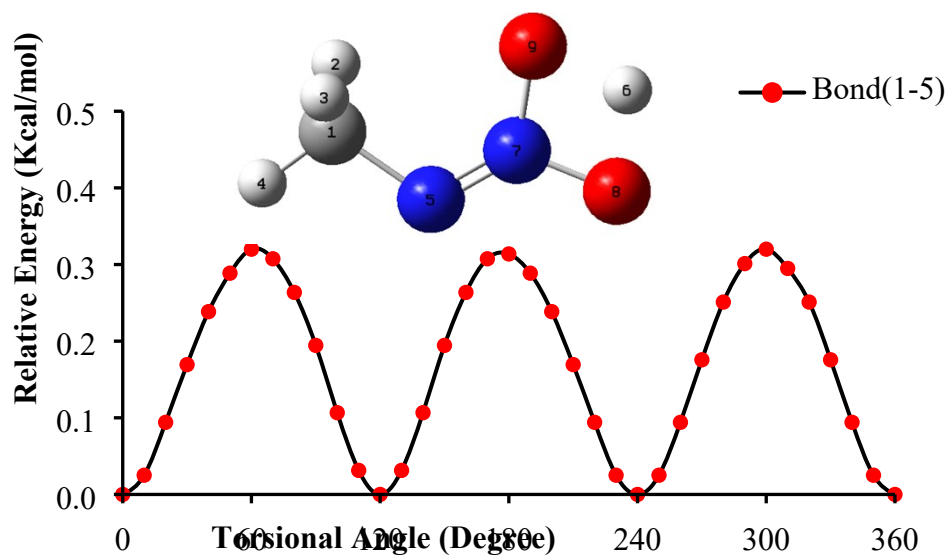

TS5

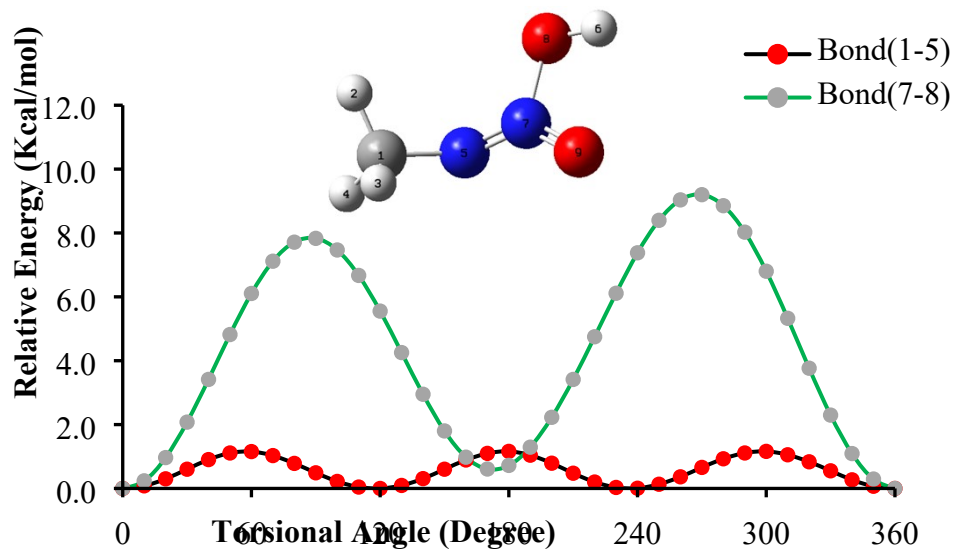

TS7

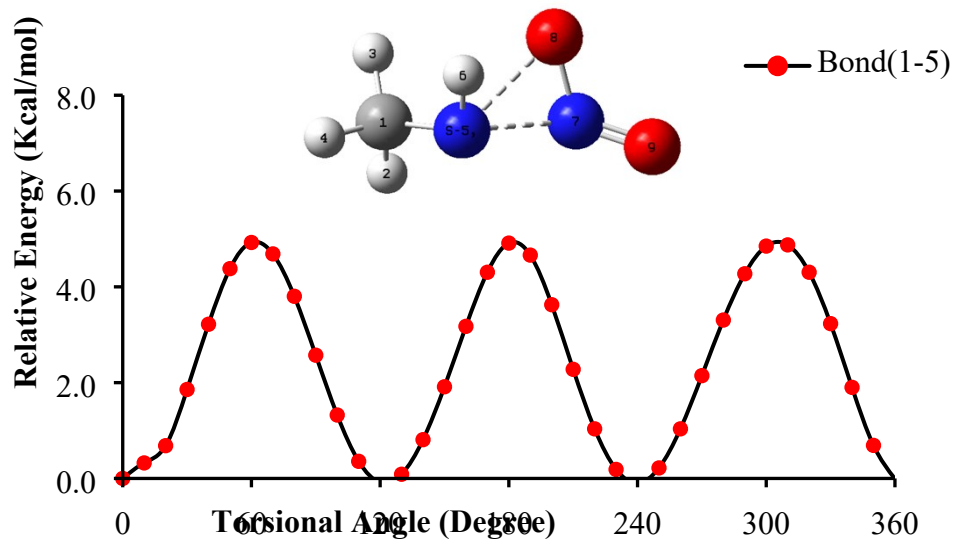

TS10

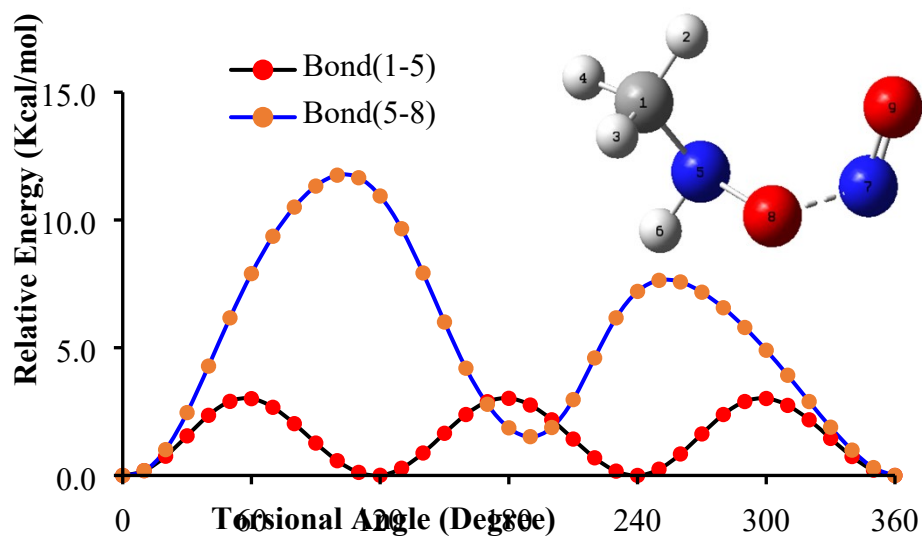

HONO

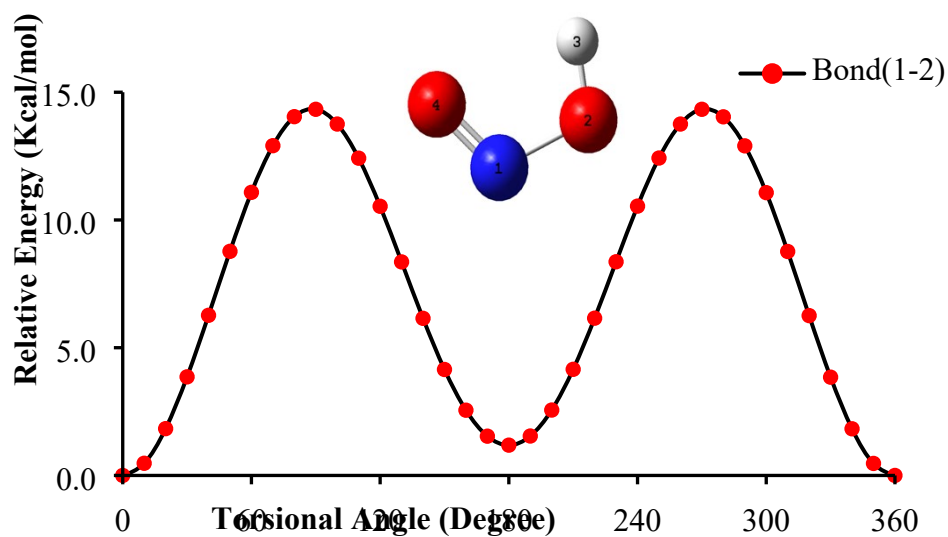

CH<sub>2</sub>N-NO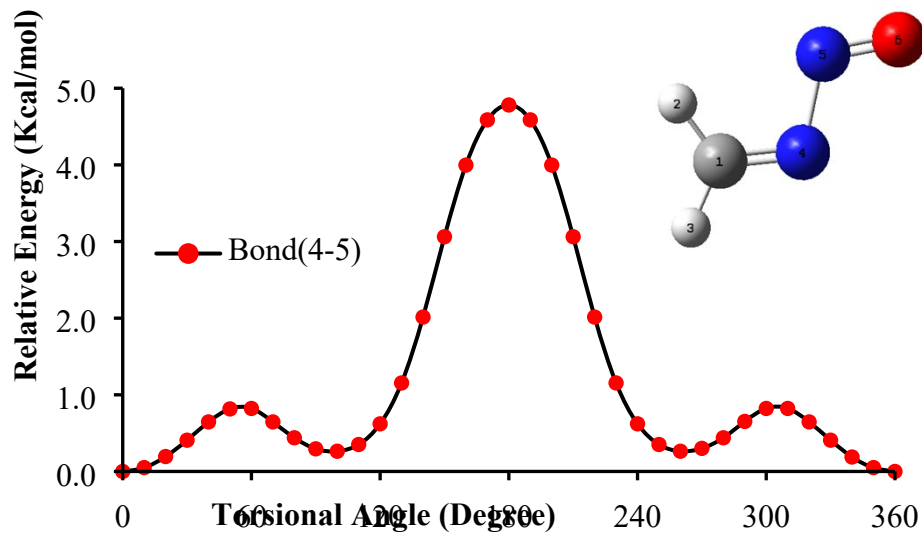CH<sub>3</sub>N-NO (*trans*)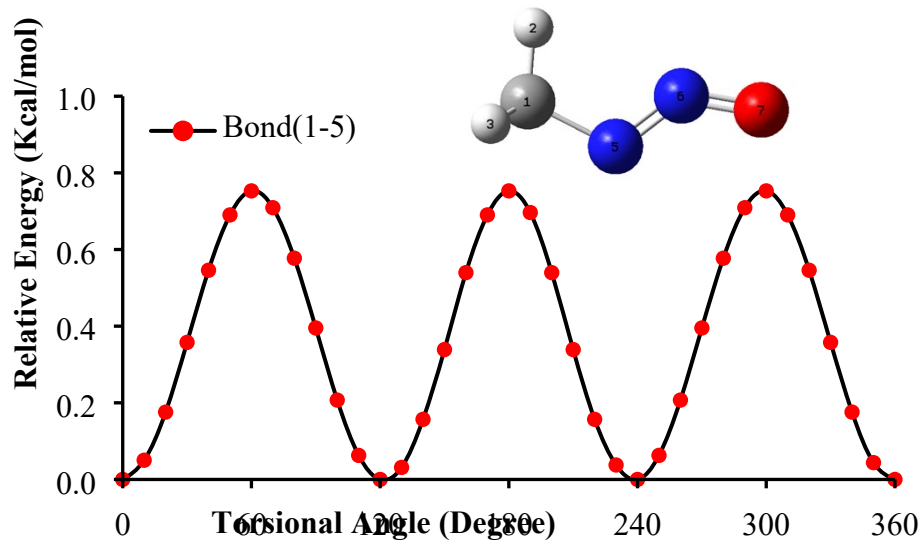CH<sub>3</sub>N-NO (*cis*)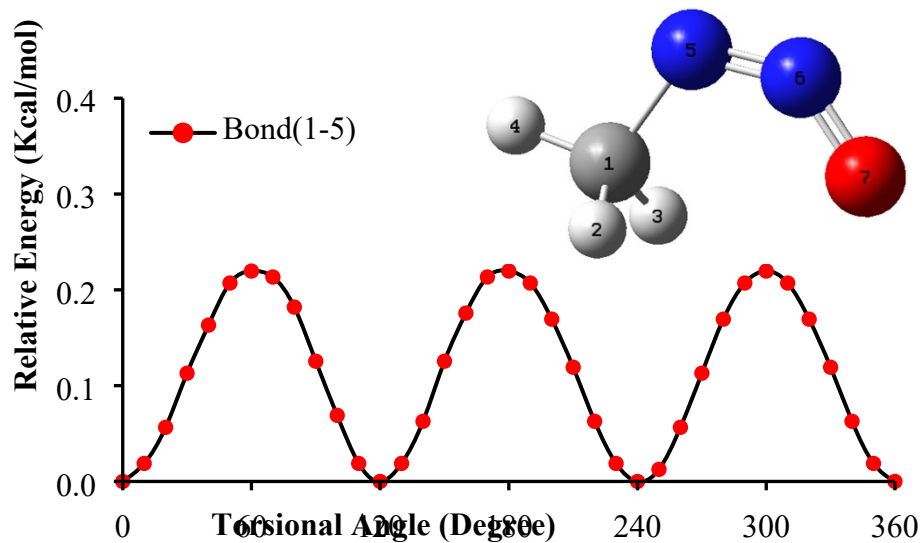



CH<sub>3</sub>NHO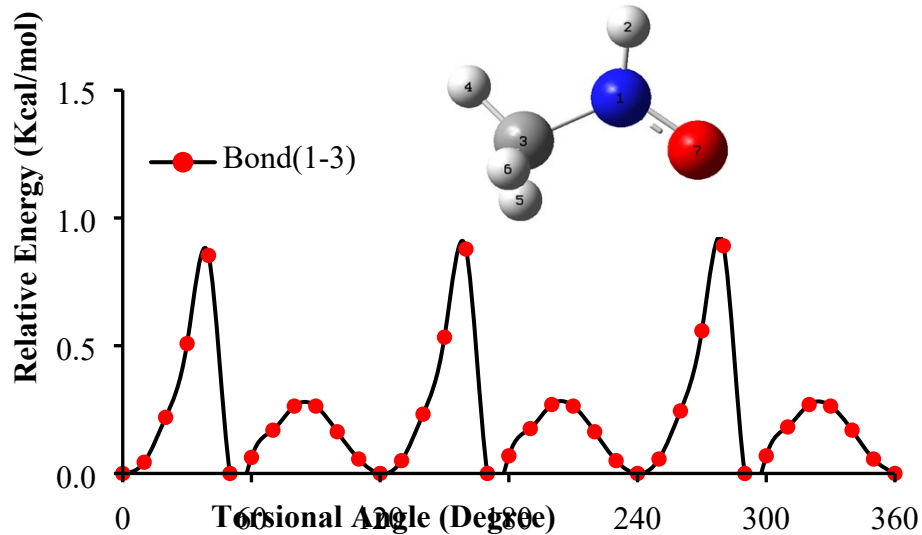

**Figure S3:** Hindrance potentials for the species involved in the CH<sub>3</sub>NH + NO<sub>2</sub> reaction, calculated at B3LYP/cc-pVDZ level of theory.

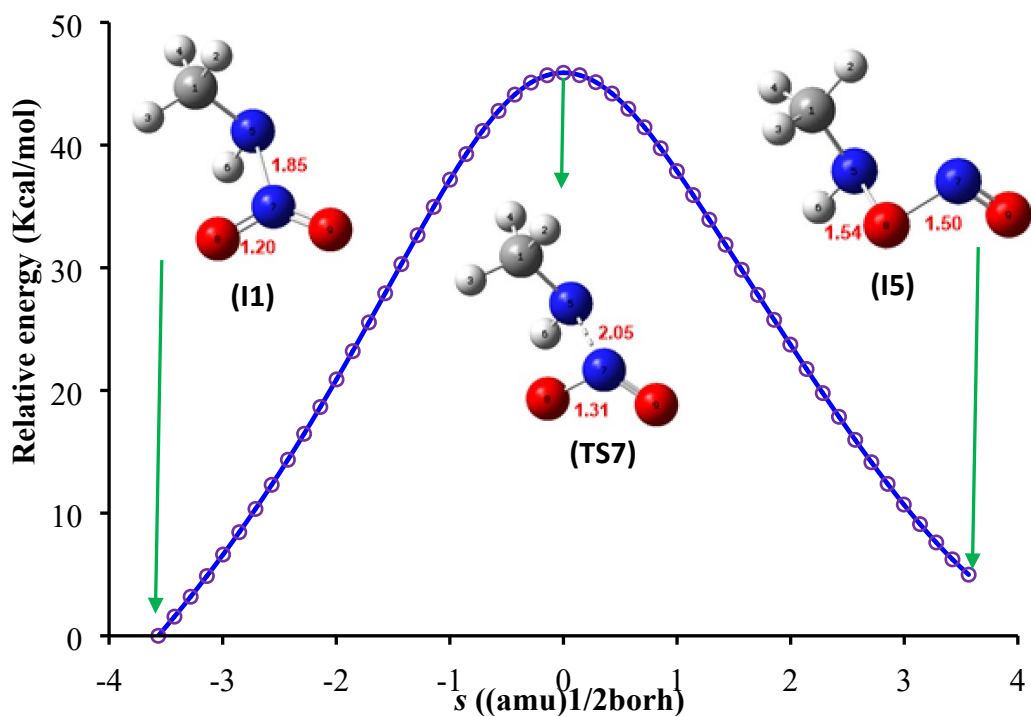

**Figure S4:** IRC plot for the conversion between **I1** and **I5** (via **TS7**) calculated at B3LYP/cc-pVTZ+d level of theory. Distances are in Å.

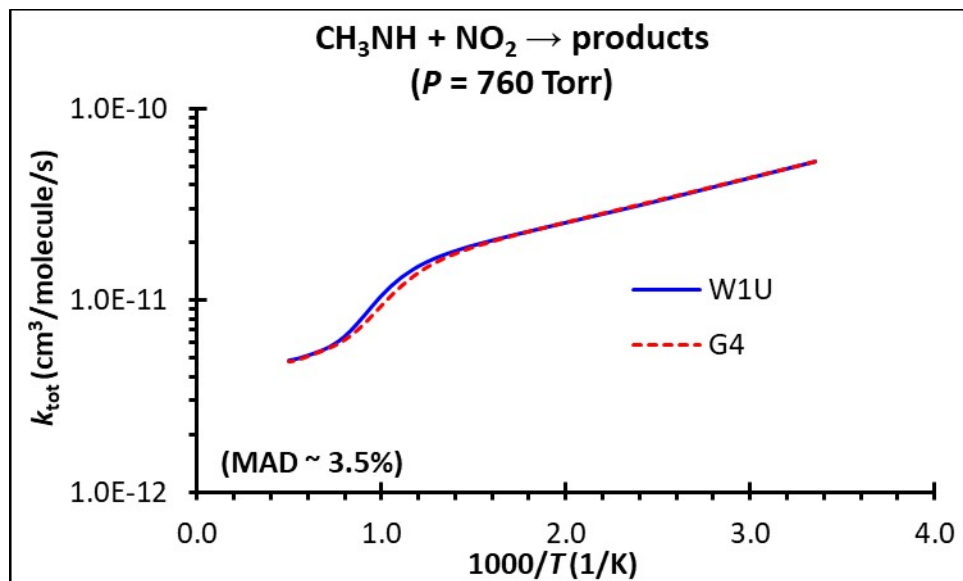

**Figure S5:** Calculated overall rate constant,  $k_{\text{tot}}$ , for the reaction between CH<sub>3</sub>NH and NO<sub>2</sub> using the PES characterized at W1U and G4 levels of theory at  $P = 760$  Torr.

## References

1. T. Shimanouchi, *Tables of Molecular Vibrational Frequencies, Consolidated Volume 1, NSRDS NBS-39*.
2. L. M. Sverdlov, M. A. Kovner and E. P. Krainov, *Vibrational Spectra of Polyatomic Molecules*, Wiley, New York, 1974.
3. M. E. Jacox, *J. Phys. Chem. Ref. Data*, 1994, **Monograph 3**
4. K. P. Huber and G. Herzberg, *Molecular Spectra and Molecular Structure. IV. Constants of Diatomic Molecules*, Van Nostrand Reinhold Co, 1979.
